# Supplementary material
Source: ML conference proceedings conference paper supplement (https://openaccess.thecvf.com/content/CVPR2025/html/Lin_AI-Face_A_Million-Scale_CVPR_2025_paper.html)
Supplement: Supplementary file 1 [file Lin_AI-Face_A_Million-Scale_CVPR_2025_supplemental.pdf]

# Appendix

## A. The Definition of Demographic Categories

**Skin Tone:** Skin tone is an important attribute of human appearance, with significant variation from pale to dark. Recently, AI systems, especially computer vision models, have become controversial over concerns about the potential bias of performance varying based on skin tone [46, 106, 107]. Additionally, existing research has pointed out that skin tone annotations can be potentially less biased than building a racial classifier [108]. And the ethnicity attribute is subjective and can conceptually cause confusion in many aspects; for example, there may be no difference in facial appearance of African-American and African people, although, they may be referred to with two distinct racial categories. We, therefore, have opted to annotate the apparent skin tone of each face image. The Monk Skin Tone Scale [48] is developed specifically for the computer vision use case. We intentionally use the Monk Skin Tone scale over the Fitzpatrick skin type [109], which is developed as means for determining one’s likelihood of getting sunburn and lacks variance in darker skin tones [110, 111]. Additionally, Fitzpatrick skin type has been shown to be unreliable for image annotation [112].

**Gender:** Many governments [49, 50] have adopted binary gender (*i.e.*, Man/Male (M) and Woman/Female(F), defined as sex at birth, as a common choice for legal and institutional systems and official documents. Most facial recognition research [45, 51, 52] also considers binary genders in their analyses. Our AI-Face dataset adopts binary gender as gender attributes.

**Age:** Follow United Nations [53] and Statistics Canada [54], we have five distinct perceived age groups- Child (0-14), Youth (15-24), Adults (25-44), Middle-age Adults (45-64), and Seniors (65+).

The demographic attribute and its corresponding example images are shown from Fig. A.1 to Fig. A.3.

## B. The Details of Demographically Annotated AI-Face Dataset

### B.1. Detailed Information of Datasets

We build our AI-Face dataset by collecting and integrating public real and AI-generated face images sourced from academic publications, GitHub repositories, and commercial tools. We strictly adhere to the license agreements of all datasets to ensure that they allow inclusion in our datasets and secondary use for training and testing. Table B.1 shows the detailed information of each dataset we used in our AI-Face, including the number of samples, the link for downloading the dataset, the accessibility, and their licenses.

### B.2. Artifacts of Deepfake Forgeries in Frequency

Leveraging frequency domain information plays a pivotal role in detecting AI-generated images. Frequency-based methods analyze the frequency components of an image, capturing information that may not be readily apparent in the spatial domain. In Fig. B.2, we present the mean Fast Fourier Transform (FFT) spectrum of images sampled from various sources in our AI-Face dataset. The results indicate that generative models often concentrate their output energy in the low-frequency range, represented by the central area of the FFT spectrum, resulting in overly smooth images. Notably, some models, such as StarGAN and Midjourney, exhibit distinct frequency artifacts, suggesting that they continue to struggle with eliminating generative patterns in the frequency domain. These artifacts serve as critical cues for distinguishing synthetic images from real ones. While most prior work has focused on applying frequency information to enhance the utility performance of detectors, exploring how frequency features can be leveraged to improve the fairness of detectors presents a promising direction for future research.

### B.3. Experimental Study of Existing Face Attribute Prediction Tools

We compare current state-of-the-art face attribute prediction tools Face++ [71] and InsightFace [72] with our annotator. We perform *intra-domain* (train and test on IMDB-WIKI) and *cross-domain* (train on IMDB-WIKI, test on four AI-generated face datasets) evaluations. FF++, DFDC, DFD, and Celeb-DF-v2 are selected for cross-domain evaluation because they contain AI-generated faces, which match our objective and are not used to train Face++ and InsightFace. Additionally, they have demographic attribute annotations from [19], which can be used as ground truth for annotator evaluation. Since those annotations provided by [19] have limited age annotations, our evaluation of these four datasets is confined to gender. The intra-domain results are shown in Table B.2 and the results of cross-domain are in Table B.3. Those results demonstrate our annotator’s superiority in demographic attribute prediction and generalization capability against Face++ and InsightFace. For example, under intra-domain evaluation (Table B.2), its precision surpasses the second-best method, InsightFace, by 3.47% on

| Demographic Annotation                                                                     | Examples                                                                                                                                                                                                                                                                                                                                           |
|--------------------------------------------------------------------------------------------|----------------------------------------------------------------------------------------------------------------------------------------------------------------------------------------------------------------------------------------------------------------------------------------------------------------------------------------------------|
| Tone1     |             |
| Tone2     |             |
| Tone3     |             |
| Tone4     |             |
| Tone5     |             |
| Tone6    |         |
| Tone7   |     |
| Tone8   |     |
| Tone9   |     |
| Tone10  |     |

Figure A.1. *Demographic annotation definition and examples of **skin tone** attribute.*

Female and 24.81% on Senior. In cross-domain evaluation (Table B.2), our annotator maintains high accuracy on all datasets, reflecting good generalization. For instance, on the DFDC dataset, the precision our annotator outperforms Face++ by a margin of up to 1.07% and InsightFace by 3.32% on Female.

#### B.4. Annotator Implementation Detail

Our annotators are implemented by PyTorch and trained with a single NVIDIA RTX A6000 GPU. For training, we fix the batch size 64, epochs 32, and use Adam optimizer with an initial learning rate  $\beta = 1e - 3$ . Additionally, we employ a



| Demographic Annotation | Examples                                                                          |                                                                                   |                                                                                    |                                                                                     |
|------------------------|-----------------------------------------------------------------------------------|-----------------------------------------------------------------------------------|------------------------------------------------------------------------------------|-------------------------------------------------------------------------------------|
| Female: 0              |  |  |  |  |
| Male: 1                |  |  |  |  |

Figure A.2. Demographic annotation definition and examples of **gender** attribute.

| Demographic Annotation      | Examples                                                                            |                                                                                     |                                                                                      |                                                                                       |
|-----------------------------|-------------------------------------------------------------------------------------|-------------------------------------------------------------------------------------|--------------------------------------------------------------------------------------|---------------------------------------------------------------------------------------|
| Child (0-14): 0             |    |    |    |    |
| Youth (15-24): 1            |    |    |    |    |
| Adult (25-44): 2            |   |   |   |   |
| Middle-age Adult (45-64): 3 |  |  |  |  |
| Senior (65+): 4             |  |  |  |  |

Figure A.3. Demographic annotation definition and examples of **age** attribute.

Cosine Annealing Learning Rate Scheduler to modulate the learning rate adaptively across the training duration. In terms of the imbalance loss,  $u_{A_i}$  is the weighting factor for attribute  $A_i$ .  $h(f_i)_{A_i}$  is the predict logit on  $A_i$ .  $\zeta_{A_i}$  is the multiplicative logit scaling factor,  $\zeta_{A_i} = \left(\frac{N_{A_i}}{N_{\max}}\right)^\kappa$ ,  $N_{\max}$  is the number of samples in the most frequent class,  $\kappa$  is the hyperparameter controlling the sensitivity of scaling, it is set as 0.2 here.  $\Delta_{A_i}$  is the additive logit scaling factor, calculated as the log of  $A_i$  probabilities  $\Delta_{A_i} = \rho \cdot \log\left(\frac{N_{A_i}}{N_{\text{total}}}\right)$ . The regularization hyperparameter  $\alpha$  in fairness loss is 1e-4. The hyperparameter  $\gamma$  in SAM optimization is set as 0.05.

### B.5. Details of Human Labeling Activities in Annotation Quality Assessment

The annotation process for assessing the quality of AI-generated face image annotations followed a structured and ethically grounded methodology. Prior to labeling, all human annotators signed an Annotator Agreement E.9 outlining the project objectives, confidentiality requirements, and detailed labeling guidelines for gender and age classification. This agreement emphasized impartiality, respect, and adherence to professional conduct throughout the annotation activities. Human annotators then underwent tutorial training using real example images to familiarize themselves with demographic attributes and labeling criteria, focusing on identifying gender-specific features, such as facial structure and presence of facial hair, and age-related

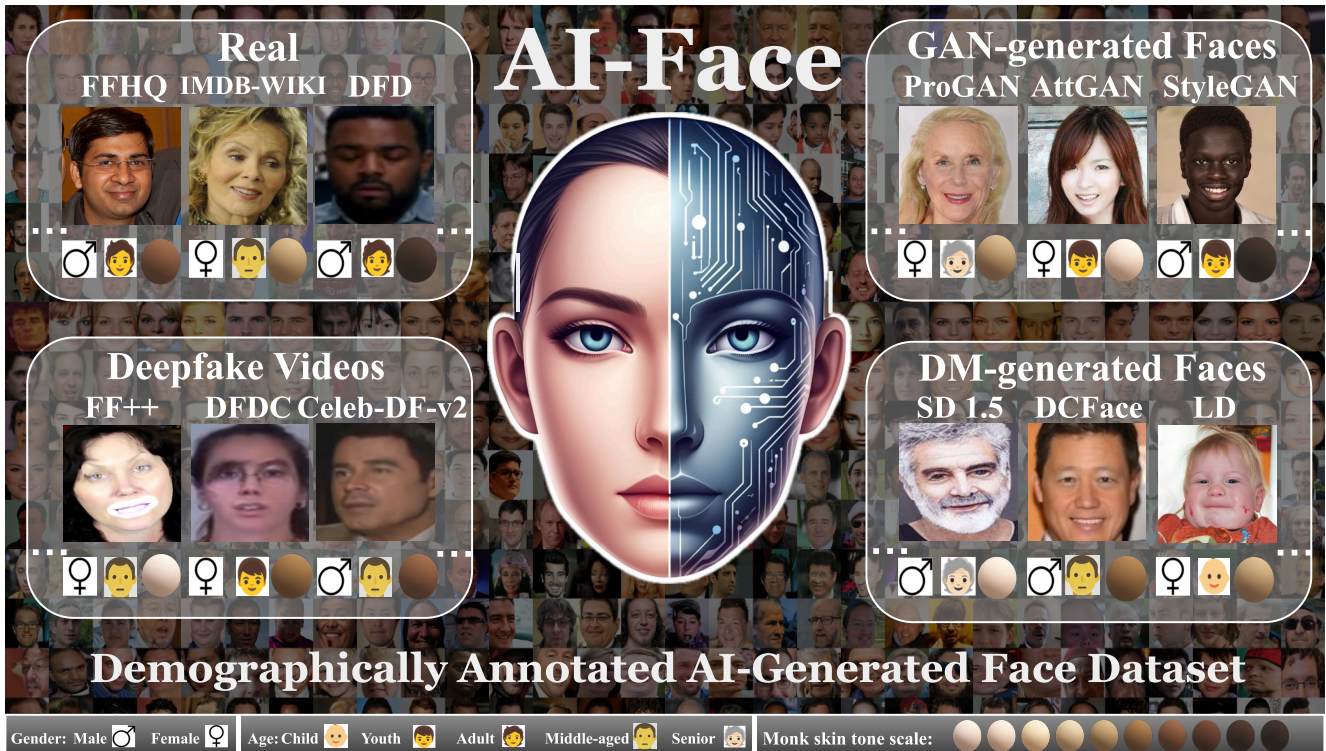

Figure B.1. Overview of AI-Face dataset. Each face has three demographic annotations.

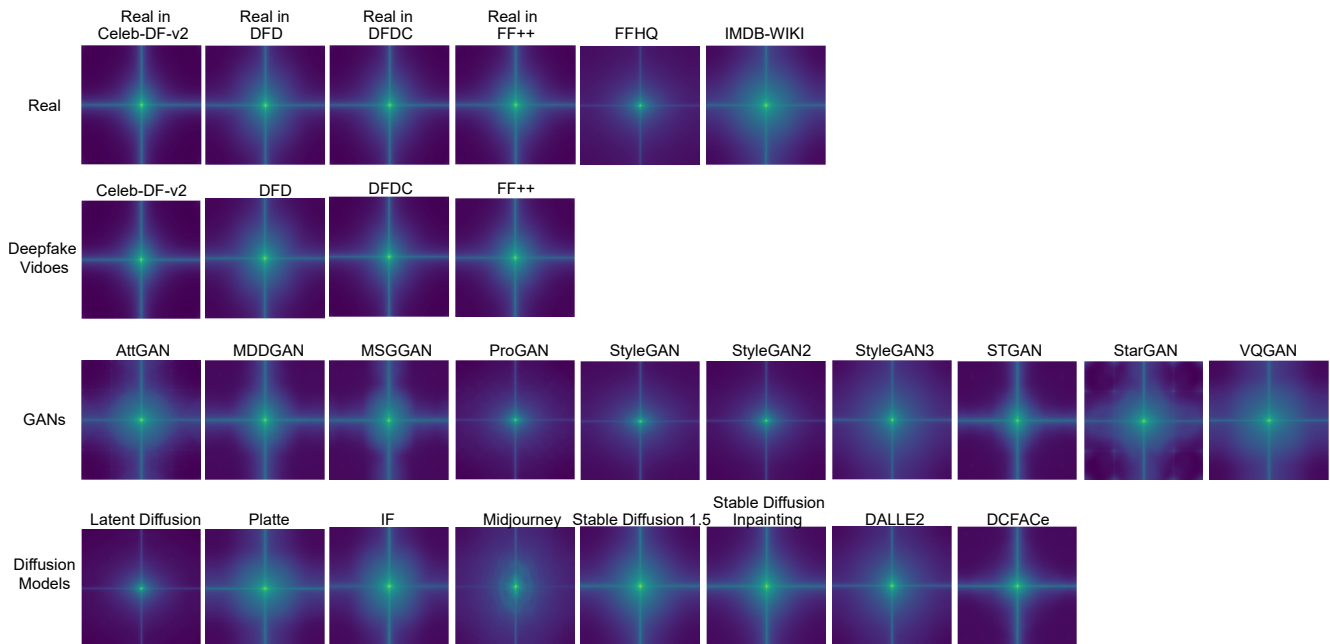

Figure B.2. Frequency analysis on various sources. The mean FFT spectrum computation involves averaging over 2,000 images. DALLE2, IF, and Midjourney take average over 200, 500, and 100, respectively, due to their small number of samples.

indicators, including wrinkles and skin elasticity.

Following the agreement and training, human annotators independently labeled the images based on the established criteria,

| Dataset                  | #Samples | Link                                                                                                                                                                        | Access                                                                                                                                                                                                                                                      | License                                  |
|--------------------------|----------|-----------------------------------------------------------------------------------------------------------------------------------------------------------------------------|-------------------------------------------------------------------------------------------------------------------------------------------------------------------------------------------------------------------------------------------------------------|------------------------------------------|
| FF++<br>[2]              | 127K     | <a href="https://github.com/ondyari/FaceForensics/tree/master/dataset">https://github.com/ondyari/FaceForensics/tree/master/dataset</a>                                     | freely shared for a research purpose,<br>submit agreement                                                                                                                                                                                                   | Non Commercial                           |
| DFDC<br>[21]             | 75K      | <a href="https://www.kaggle.com/c/deepfake-detection-challenge/data">https://www.kaggle.com/c/deepfake-detection-challenge/data</a>                                         | the rights have been cleared for real videos,<br>submit agreement                                                                                                                                                                                           | Unknown                                  |
| DFD<br>[22]              | 40K      | <a href="https://research.google/blog/contributing-data-to-deepfake-detection-research/">https://research.google/blog/contributing-data-to-deepfake-detection-research/</a> |                                                                                                                                                                                                                                                             | Non Commercial                           |
| Celeb-DF-v2<br>[23]      | 179K     | <a href="https://cse.buffalo.edu/~sim\$siweiliyu/celeb-deepfakeforensics.html">https://cse.buffalo.edu/~sim\$siweiliyu/celeb-deepfakeforensics.html</a>                     | freely shared for a research purpose,<br>submit agreement                                                                                                                                                                                                   | Non Commercial                           |
| AttGAN<br>[55]           | 6K       | <a href="https://iplab.dmi.unict.it/mfs/Deepfakes/PaperGANDCT-2021/">https://iplab.dmi.unict.it/mfs/Deepfakes/PaperGANDCT-2021/</a>                                         | Online dataset, download directly,<br>no license or agreement to sign                                                                                                                                                                                       | Unknown                                  |
| StarGAN<br>[55]          | 5.6K     |                                                                                                                                                                             |                                                                                                                                                                                                                                                             |                                          |
| StyleGAN<br>[55]         | 10K      |                                                                                                                                                                             |                                                                                                                                                                                                                                                             |                                          |
| StyleGAN2<br>[57]        | 118K     | <a href="https://github.com/SelfishGene/SFHQ-dataset">https://github.com/SelfishGene/SFHQ-dataset</a>                                                                       | Since all images in this dataset are synthetically<br>generated there are no privacy issues or<br>license issues surrounding these images.                                                                                                                  | MIT License                              |
| StyleGAN3<br>[58]        | 26.7K    | <a href="https://huggingface.co/datasets/InfImagine/FakeImageDataset">https://huggingface.co/datasets/InfImagine/FakeImageDataset</a>                                       | This dataset are fully open for academic research<br>and can be used for commercial purposes<br>with official written permission.                                                                                                                           | Apache-2.0                               |
| MMDGAN<br>[56]           | 1K       | <a href="https://github.com/vishal3477/Reverse_Engineering_GMs/blob/main/dataset/">https://github.com/vishal3477/Reverse_Engineering_GMs/blob/main/dataset/</a>             | The dataset can be used for research purposes<br>only and can be used for commercial purposes<br>with official written permission.                                                                                                                          | Non Commercial                           |
| MSGGAN<br>[56]           | 1K       |                                                                                                                                                                             |                                                                                                                                                                                                                                                             |                                          |
| STGAN<br>[56]            | 1K       |                                                                                                                                                                             |                                                                                                                                                                                                                                                             |                                          |
| ProGAN<br>[59]           | 100K     | <a href="https://drive.google.com/drive/folders/1jU-hzyvD2Nn_M3ucuv59xtJNc9bPLGJ">https://drive.google.com/drive/folders/1jU-hzyvD2Nn_M3ucuv59xtJNc9bPLGJ</a>               | Online dataset, download directly,<br>no license or agreement to sign                                                                                                                                                                                       | Unknown                                  |
| VQGAN<br>[60]            | 50K      | <a href="https://github.com/awsaf49/artifact">https://github.com/awsaf49/artifact</a>                                                                                       | This dataset comes from ArtiFact dataset,<br>which dataset takes leverage of data<br>from multiple methods thus different parts<br>of the dataset come with different licenses.                                                                             | MIT License                              |
| DALLE2<br>[61]           | 204      | <a href="https://github.com/ZhendongWang6/DIRE">https://github.com/ZhendongWang6/DIRE</a>                                                                                   | freely shared for a research purpose                                                                                                                                                                                                                        | Unknown                                  |
| IF<br>[61]               | 505      |                                                                                                                                                                             |                                                                                                                                                                                                                                                             |                                          |
| Midjourney<br>[61]       | 100      |                                                                                                                                                                             |                                                                                                                                                                                                                                                             |                                          |
| DCFACe<br>[62]           | 529K     | <a href="https://github.com/mk-minchul/dface">https://github.com/mk-minchul/dface</a>                                                                                       | freely shared for a research purpose                                                                                                                                                                                                                        |                                          |
| Latent Diffusion<br>[63] | 20K      | <a href="https://github.com/grip-unina/DMImageDetection">https://github.com/grip-unina/DMImageDetection</a>                                                                 | Copyright 2024 Image Processing Research Group of<br>University Federico II of Naples ('GRIP-UNINA').<br>All rights reserved.Licensed under the<br>Apache License, Version 2.0 (the "License")                                                              | Apache-2.0                               |
| Palette<br>[64]          | 6K       | <a href="https://github.com/awsaf49/artifact/?tab=readme-ov-file#data-generation">https://github.com/awsaf49/artifact/?tab=readme-ov-file#data-generation</a>               | This dataset comes from ArtiFact dataset,<br>which dataset takes leverage of data from<br>multiple methods thus different parts<br>of the dataset come with different licenses.                                                                             | MIT License                              |
| SD v1.5<br>[65]          | 18K      | <a href="https://huggingface.co/datasets/OpenRL/DeepFakeFace">https://huggingface.co/datasets/OpenRL/DeepFakeFace</a>                                                       | freely shared for a research purpose                                                                                                                                                                                                                        | Apache-2.0                               |
| SD Inpainting<br>[65]    | 20.9K    |                                                                                                                                                                             |                                                                                                                                                                                                                                                             |                                          |
| FFHQ<br>[6]              | 70K      | <a href="https://github.com/NVLabs/ffhq-dataset">https://github.com/NVLabs/ffhq-dataset</a>                                                                                 | You can use, redistribute, and adapt it for<br>non-commercial purposes, as long as you<br>(a) give appropriate credit by citing our paper,<br>(b) indicate any changes that you've made, and<br>(c) distribute any derivative works under the same license. | Creative Commons<br>BY-NC-SA 4.0 license |
| IMDB-WIKI<br>[20]        | 239K     | <a href="https://data.vision.ee.ethz.ch/cvl/rrothe/imdb-wiki/">https://data.vision.ee.ethz.ch/cvl/rrothe/imdb-wiki/</a>                                                     | This dataset is made available for academic<br>research purpose only. All the images are<br>collected from the Internet, and the<br>copyright belongs to the original owners.                                                                               | Non Commercial                           |

Table B.1. A list of datasets used in AI-Face, including the number of samples, links, access details, and licenses.

| Method      | Female                    |                           |                         | Male                      |                           |                         | Child                     |                           |                           | Young                     |                           |                           | Adult                     |                           |                           | Mid                       |                           |                           | Senior                    |                           |                           |
|-------------|---------------------------|---------------------------|-------------------------|---------------------------|---------------------------|-------------------------|---------------------------|---------------------------|---------------------------|---------------------------|---------------------------|---------------------------|---------------------------|---------------------------|---------------------------|---------------------------|---------------------------|---------------------------|---------------------------|---------------------------|---------------------------|
|             | Precision                 | Recall                    | F1                      | Precision                 | Recall                    | F1                      | Precision                 | Recall                    | F1                        | Precision                 | Recall                    | F1                        | Precision                 | Recall                    | F1                        | Precision                 | Recall                    | F1                        | Precision                 | Recall                    | F1                        |
| Face ++     | 0.9161<br>(0.0064)        | 0.9142<br>(0.0031)        | 0.9151<br>0.0045        | 0.9143<br>(0.0033)        | 0.9163<br>(0.0067)        | 0.9153<br>0.0048        | 0.8579<br>(0.0962)        | 0.0220<br>(0.0062)        | 0.0429<br>(0.0119)        | 0.3942<br>(0.0222)        | 0.2940<br>(0.0161)        | 0.3368<br>(0.0186)        | 0.3215<br>(0.0054)        | 0.6700<br>(0.0192)        | 0.4345<br>(0.0087)        | 0.5423<br>(0.0160)        | 0.6460<br>(0.0210)        | 0.5894<br>(0.0147)        | 0.8078<br>(0.0143)        | 0.7700<br>(0.0165)        | 0.7884<br>(0.0127)        |
| Insightface | 0.9648<br>(0.0055)        | 0.9405<br>(0.0058)        | 0.9525<br>0.0017        | 0.9420<br>(0.0050)        | 0.9656<br>(0.0057)        | 0.9537<br>0.0017        | <b>1.0000</b><br>(0.0000) | 0.0020<br>(0.0016)        | 0.0040<br>(0.0032)        | 0.3970<br>(0.0337)        | 0.0693<br>(0.0098)        | 0.1180<br>(0.0155)        | 0.2599<br>(0.0027)        | 0.6180<br>(0.0124)        | 0.3659<br>(0.0048)        | 0.4105<br>(0.0067)        | 0.5733<br>(0.0196)        | 0.4783<br>(0.0094)        | 0.7224<br>(0.0124)        | 0.7560<br>(0.0238)        | 0.7386<br>(0.0143)        |
| Ours        | <b>0.9995</b><br>(0.0006) | <b>0.9992</b><br>(0.0006) | <b>0.9993</b><br>0.0006 | <b>0.9992</b><br>(0.0006) | <b>0.9995</b><br>(0.0006) | <b>0.9993</b><br>0.0006 | 0.9787<br>(0.0027)        | <b>0.9780</b><br>(0.0062) | <b>0.9783</b><br>(0.0039) | <b>0.9560</b><br>(0.0078) | <b>0.9393</b><br>(0.0080) | <b>0.9476</b><br>(0.0042) | <b>0.9265</b><br>(0.0122) | <b>0.9547</b><br>(0.0107) | <b>0.9402</b><br>(0.0058) | <b>0.9498</b><br>(0.0123) | <b>0.9320</b><br>(0.0123) | <b>0.9408</b><br>(0.0124) | <b>0.9642</b><br>(0.0085) | <b>0.9700</b><br>(0.0087) | <b>0.9671</b><br>(0.0082) |

Table B.2. Detailed comparison of our annotator against Face++ [71] and InsightFace [72] on IMDB-WIKI [20] dataset. Prediction mean and standard deviation (in parentheses) of each method across 5 random samplings are reported. The best results are shown in Bold.

categorizing gender and age into predefined classes, and recorded their annotations in a CSV file. A structured conflict resolution approach ensured accuracy and consistency in annotations. Labels agreed upon by a majority of annotators were finalized directly, while unanimous disagreements were resolved through collaborative discussions guided by the annotation guidelines. This process ensured that all annotations were objective, reliable, and aligned with ethical standards set forth in the signed agreement.



| Dataset     | Method      | precision         | Female recall     | F1                | precision         | Male recall       | F1                |
|-------------|-------------|-------------------|-------------------|-------------------|-------------------|-------------------|-------------------|
|             |             |                   |                   |                   |                   |                   |                   |
| FF++        | Face ++     | <b>0.9816</b>     | 0.9795            | 0.9805            | 0.9795            | <b>0.9816</b>     | 0.9805            |
|             |             | ( <b>0.3021</b> ) | (0.1360)          | (0.1459)          | (0.1312)          | ( <b>0.3084</b> ) | (0.1508)          |
|             | Insightface | 0.9700            | 0.9664            | 0.9682            | 0.9666            | 0.9713            | 0.9683            |
|             |             | (0.4697)          | (0.6046)          | (0.3867)          | (0.5794)          | (0.4815)          | (0.3802)          |
|             | Ours        | 0.9799            | <b>0.9992</b>     | <b>0.9894</b>     | <b>0.9992</b>     | 0.9795            | <b>0.9892</b>     |
|             |             | (0.0022)          | ( <b>0.0006</b> ) | ( <b>0.0009</b> ) | ( <b>0.0007</b> ) | (0.0023)          | ( <b>0.0009</b> ) |
| DFDC        | Face ++     | 0.9412            | 0.8992            | 0.9197            | 0.9035            | 0.9437            | <b>0.9231</b>     |
|             |             | (0.9771)          | (1.0095)          | (0.5639)          | (0.8353)          | (1.0246)          | ( <b>0.5353</b> ) |
|             | Insightface | 0.9187            | 0.7869            | 0.8475            | 0.8139            | 0.9301            | 0.8680            |
|             |             | (0.9855)          | (1.7976)          | (0.7444)          | (1.1401)          | (1.0587)          | (0.3842)          |
|             | Ours        | <b>0.9519</b>     | <b>0.9741</b>     | <b>0.9629</b>     | <b>0.9735</b>     | <b>0.9507</b>     | 0.0114            |
|             |             | ( <b>0.0106</b> ) | ( <b>0.0014</b> ) | ( <b>0.0059</b> ) | ( <b>0.0015</b> ) | ( <b>0.9619</b> ) | (0.0064)          |
| DFD         | Face ++     | <b>0.9501</b>     | 0.8228            | 0.8818            | 0.8440            | <b>0.9568</b>     | 0.8968            |
|             |             | ( <b>0.3773</b> ) | (1.8758)          | (1.0113)          | (1.3784)          | ( <b>0.3907</b> ) | (0.6856)          |
|             | Insightface | 0.9441            | 0.7557            | 0.8394            | 0.7964            | 0.9552            | 0.8686            |
|             |             | (0.7765)          | (0.9555)          | (0.7937)          | (0.6834)          | (0.6344)          | (0.5961)          |
|             | Ours        | 0.9378            | <b>0.9365</b>     | <b>0.9366</b>     | <b>0.9366</b>     | 0.9379            | <b>0.9372</b>     |
|             |             | (0.0045)          | ( <b>0.0053</b> ) | ( <b>0.0033</b> ) | ( <b>0.0049</b> ) | (0.0048)          | ( <b>0.0033</b> ) |
| Celeb-DF-v2 | Face ++     | 0.9989            | 0.9648            | 0.9815            | 0.9660            | 0.9989            | 0.9822            |
|             |             | (0.0553)          | (0.4182)          | (0.2361)          | (0.3918)          | (0.0533)          | (0.2215)          |
|             | Insightface | 0.9984            | 0.9811            | 0.9896            | 0.9814            | 0.9984            | 0.9898            |
|             |             | (0.0541)          | (0.3518)          | (0.1801)          | (0.3396)          | (0.0534)          | (0.1737)          |
|             | Ours        | <b>1.0000</b>     | <b>0.9997</b>     | <b>0.9999</b>     | <b>0.9997</b>     | <b>1.0000</b>     | <b>0.9999</b>     |
|             |             | ( <b>0.0000</b> ) | ( <b>0.0005</b> ) | ( <b>0.0003</b> ) | ( <b>0.0005</b> ) | ( <b>0.0000</b> ) | ( <b>0.0003</b> ) |

Table B.3. Detailed comparison of our annotator against Face++ [71] and InsightFace [72] on FF++ [2], DFDC [21], DFD [22], and Celeb-DF-v2 [23] datasets. Prediction mean and standard deviation (in parentheses) of each method across 5 random samplings. The best results are shown in Bold.

## B.6. Visualization of Skin Tone Annotation Generation

The visualization shown in Fig. B.3 illustrates the skin tone estimation process using the Monk Skin Tone (MST) Scale. Each row represents a sample image, showing the progression from the original face with facial landmarks to the masked skin region that excludes non-skin areas like eyes and lips. Subsequently, the K-Means clustered skin region highlights the dominant skin tones extracted from the facial area. On the right, bar plots display the proportions of the top three dominant tones within the clustered region, with the top tone (largest cluster) mapped to the closest MST Scale shade. This mapping is achieved by calculating the maximum similarity, as indicated by the Euclidean distance in RGB space between the cluster centroid and MST reference colors. This process visually demonstrates how the methodology isolates, clusters, and estimates skin tones for accurate skin tone annotation generation.

## C. Fairness Benchmark Settings

### C.1. Implementation Detail

For fairness benchmark, all experiments are based on the PyTorch with a single NVIDIA RTX A6000 GPU. During training, we utilize SGD optimizer with a learning rate of 0.0005, with momentum of 0.9 and weight decay of 0.005. The batch size is set to 128 for most detectors. However, for the SRM [87], UCF [26], and PG-FDD [30], the batch size is adjusted to 32 due to GPU memory. For hyperparameters defined in these detectors, we use the default values set in their original papers. All detectors are initialized with their official pre-trained weights, and trained for 10 epochs.

### C.2. Details of Detection Methods

We summarized the backbone architecture, GitHub repository link, and publication venue of the detectors implemented in our fairness benchmark in Table C.1. A brief introduction to each detector is provided below:

**Xception** [82]: is a deep convolutional neural network (CNN) architecture that relies on depthwise separable convolutions. This approach significantly reduces the number of parameters and computational cost while maintaining high performance. Xception serves as a classic backbone in deepfake detectors.

**EfficientB4** [83]: is part of the EfficientNet family [83], which utilizes a novel model scaling method that uniformly scales all



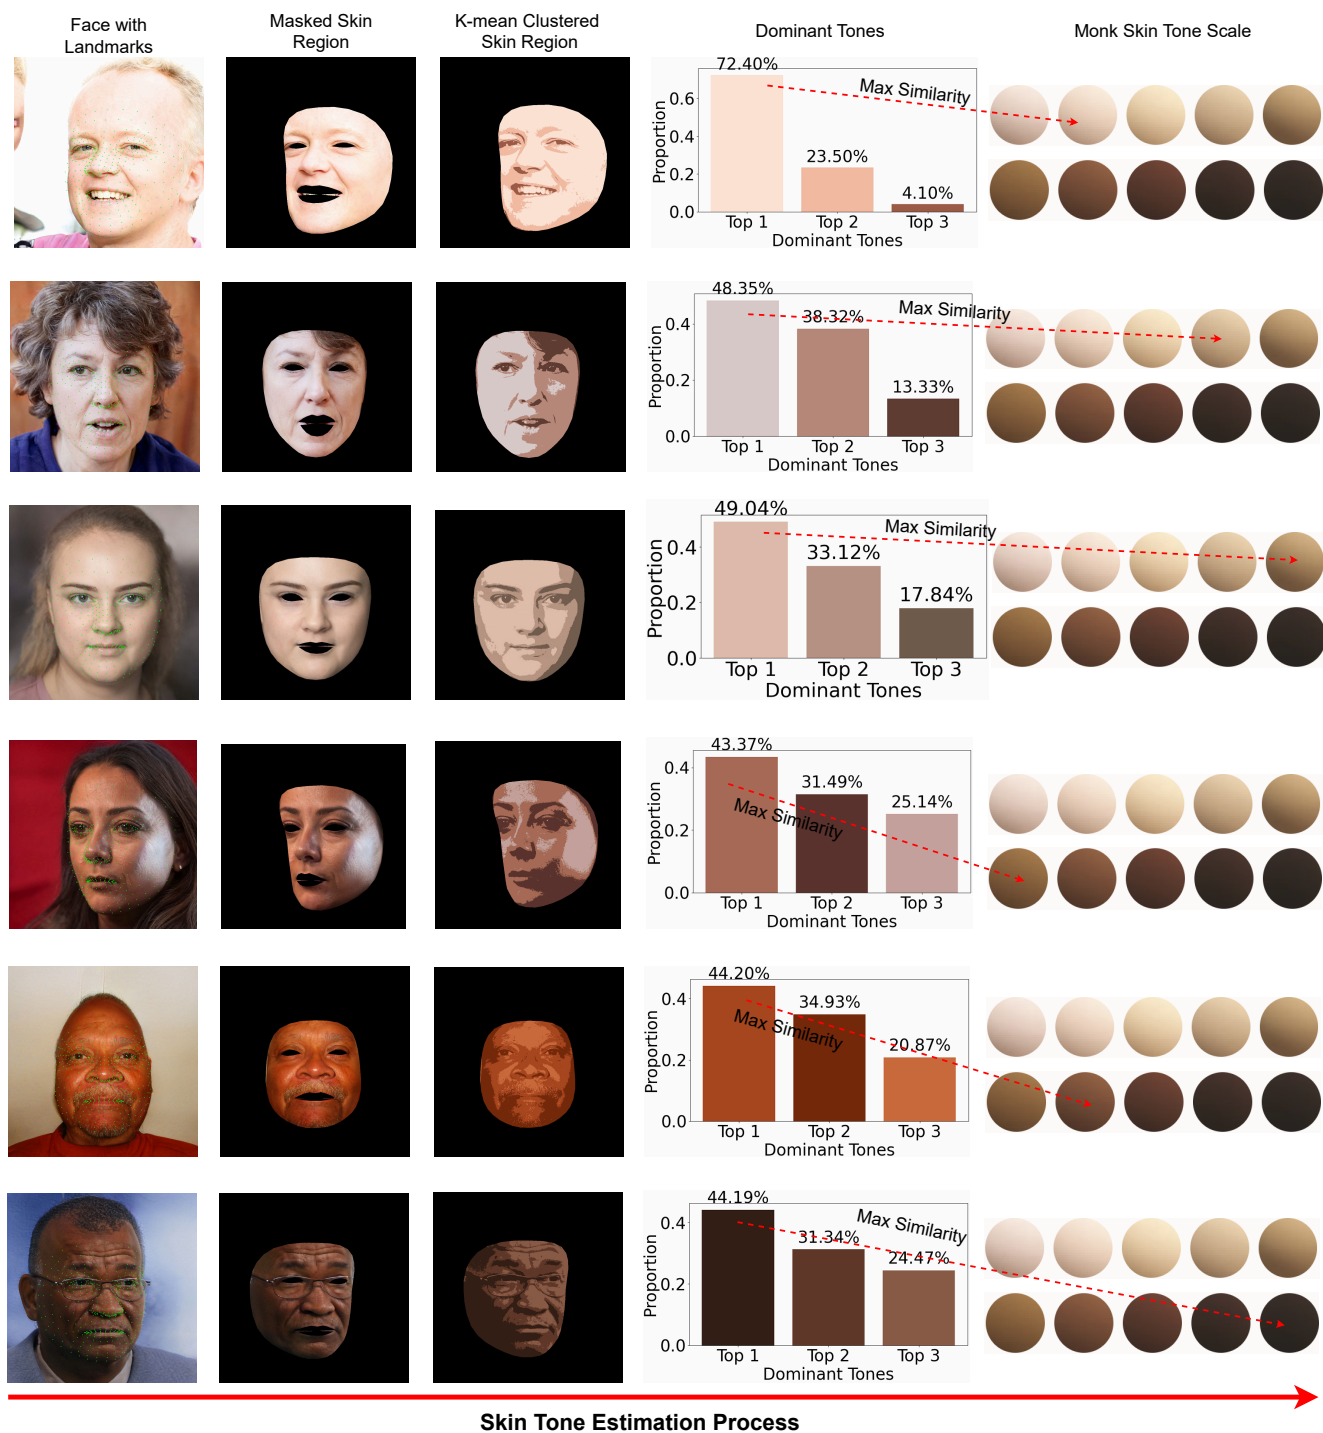

Figure B.3. Visualization of the skin tone estimation process.

dimensions of depth, width, and resolution using a compound coefficient. EfficientNet also serves as a classic backbone in deepfake detectors.

**ViT-B/16** [84]: is a model that applies the transformer architecture, the 'B' denotes the base model size, and '16' indicates the patch size. ViT-B/16 splits images into 16 patches, linearly embeds each patch, adds positional embeddings, and feeds the resulting sequence of vectors into a standard transformer encoder.

| Model Type        | Detector          | Backbone     | GitHub Link                                                                                                             | VENUE      |
|-------------------|-------------------|--------------|-------------------------------------------------------------------------------------------------------------------------|------------|
| Naive             | Xception [82]     | Xception     | <a href="https://github.com/ondyari/FaceForensics/blob/master">https://github.com/ondyari/FaceForensics/blob/master</a> | ICCV-2019  |
|                   | Efficient-B4 [83] | EfficientNet | <a href="https://github.com/lukemelas/EfficientNet-PyTorch">https://github.com/lukemelas/EfficientNet-PyTorch</a>       | ICML-2019  |
|                   | ViT-B/16 [84]     | Transformer  | <a href="https://github.com/lucidrains/vit-pytorch">https://github.com/lucidrains/vit-pytorch</a>                       | ICLR-2021  |
| Spatial           | UCF [26]          | Xception     | <a href="https://github.com/SCLBD/DeepfakeBench/tree/main">https://github.com/SCLBD/DeepfakeBench/tree/main</a>         | ICCV-2023  |
|                   | UnivFD [88]       | CLIP ViT     | <a href="https://github.com/Yuheng-Li/UniversalFakeDetect">https://github.com/Yuheng-Li/UniversalFakeDetect</a>         | CVPR-2023  |
|                   | CORE [89]         | Xception     | <a href="https://github.com/niyunsheng/CORE">https://github.com/niyunsheng/CORE</a>                                     | CVPRW-2022 |
| Frequency         | F3Net [85]        | Xception     | <a href="https://github.com/yyk-wew/F3Net">https://github.com/yyk-wew/F3Net</a>                                         | ECCV-2020  |
|                   | SRM [87]          | Xception     | <a href="https://github.com/SCLBD/DeepfakeBench/tree/main">https://github.com/SCLBD/DeepfakeBench/tree/main</a>         | CVPR-2021  |
|                   | SPSL [86]         | Xception     | <a href="https://github.com/SCLBD/DeepfakeBench/tree/main">https://github.com/SCLBD/DeepfakeBench/tree/main</a>         | CVPR-2021  |
| Fairness-enhanced | DAW-FDD [29]      | Xception     | Unpublished code, reproduced by us                                                                                      | WACV-2024  |
|                   | DAG-FDD [29]      | Xception     | Unpublished code, reproduced by us                                                                                      | WACV-2024  |
|                   | PG-FDD [30]       | Xception     | <a href="https://github.com/Purdue-M2/Fairness-Generalization">https://github.com/Purdue-M2/Fairness-Generalization</a> | CVPR-2024  |

Table C.1. Summary of the implemented detectors in our fairness benchmark.

**F3Net [85]**: utilizes a cross-attention two-stream network to effectively identify frequency-aware clues by integrating two branches: FAD and LFS. The FAD (Frequency-aware Decomposition) module divides the input image into various frequency bands using learnable partitions, representing the image with frequency-aware components to detect forgery patterns through this decomposition. Meanwhile, the LFS (Localized Frequency Statistics) module captures local frequency statistics to highlight statistical differences between authentic and counterfeit faces.

**SPSL [86]**: integrates spatial image data with the phase spectrum to detect up-sampling artifacts in face forgeries, enhancing the model’s generalization ability for face forgery detection. The paper provides a theoretical analysis of the effectiveness of using the phase spectrum. Additionally, it highlights that local texture information is more important than high-level semantic information for accurately detecting face forgeries.

**SRM [87]**: extracts high-frequency noise features and combines two different representations from the RGB and frequency domains to enhance the model’s generalization ability for face forgery detection.

**UCF [26]**: presents a multi-task disentanglement framework designed to tackle two key challenges in deepfake detection: overfitting to irrelevant features and overfitting to method-specific textures. By identifying and leveraging common features, this framework aims to improve the model’s generalization ability.

**UnivFD [88]**: uses the frozen CLIP ViT-L/14 [73] as feature extractor and trains the last linear layer to classify fake and real images.

**CORE [89]**: explicitly enforces the consistency of different representations. It first captures various representations through different augmentations and then regularizes the cosine distance between these representations to enhance their consistency.

**DAW-FDD [29]**: a demographic-aware Fair Deepfake Detection (DAW-FDD) method leverages demographic information and employs an existing fairness risk measure [113]. At a high level, DAW-FDD aims to ensure that the losses achieved by different user-specified groups of interest (*e.g.*, different races or genders) are similar to each other (so that the AI face detector is not more accurate on one group vs another) and, moreover, that the losses across all groups are low. Specifically, DAW-FDD uses a CVaR [114, 115] loss function across groups (to address imbalance in demographic groups) and, per group, DAW-FDD uses another CVaR loss function (to address imbalance in real vs AI-generated training examples).

**DAG-FDD [29]**: a demographic-agnostic Fair Deepfake Detection (DAG-FDD) method, which is based on the distributionally robust optimization (DRO) [116, 117]. To use DAG-FDD, the user does not have to specify which attributes to treat as sensitive such as race and gender, only need to specify a probability threshold for a minority group without explicitly identifying all possible groups.

**PG-FDD [30]**: PG-FDD (Preserving Generalization Fair Deepfake Detection) employs disentanglement learning to extract demographic and domain-agnostic forgery features, promoting fair learning across a flattened loss landscape. Its framework combines disentanglement learning, fairness learning, and optimization modules. The disentanglement module introduces a loss to expose demographic and domain-agnostic features that enhance fairness generalization. The fairness learning module combines these features to promote fair learning, guided by generalization principles. The optimization module flattens the loss landscape, helping the model escape suboptimal solutions and strengthen fairness generalization.

### C.3. Fairness Metrics

We assume a test set comprising indices  $\{1, \dots, n\}$ .  $Y_j$  and  $\hat{Y}_j$  respectively represent the true and predicted labels of the sample  $X_j$ . Their values are binary, where 0 means real and 1 means fake. For all fairness metrics, a lower value means better

performance. The formulations of fairness metrics are as follows,

$$\begin{aligned}
F_{EO} &:= \sum_{\mathcal{J}_j \in \mathcal{J}} \sum_{q=0}^1 \left| \frac{\sum_{j=1}^n \mathbb{I}[\hat{Y}_j=1, D_j=\mathcal{J}_j, Y_j=q]}{\sum_{j=1}^n \mathbb{I}[D_j=\mathcal{J}_j, Y_j=q]} - \frac{\sum_{j=1}^n \mathbb{I}[\hat{Y}_j=1, Y_j=q]}{\sum_{j=1}^n \mathbb{I}[Y_j=q]} \right|, \\
F_{OAE} &:= \max_{\mathcal{J}_j \in \mathcal{J}} \left\{ \frac{\sum_{j=1}^n \mathbb{I}[\hat{Y}_j=Y_j, D_j=\mathcal{J}_j]}{\sum_{j=1}^n \mathbb{I}[D_j=\mathcal{J}_j]} - \min_{\mathcal{J}_j' \in \mathcal{J}} \frac{\sum_{j=1}^n \mathbb{I}[\hat{Y}_j=Y_j, D_j=\mathcal{J}_j']}{\sum_{j=1}^n \mathbb{I}[D_j=\mathcal{J}_j']} \right\}, \\
F_{DP} &:= \max_{q \in \{0,1\}} \left\{ \max_{\mathcal{J}_j \in \mathcal{J}} \frac{\sum_{j=1}^n \mathbb{I}[\hat{Y}_j=q, D_j=\mathcal{J}_j]}{\sum_{j=1}^n \mathbb{I}[D_j=\mathcal{J}_j]} - \min_{\mathcal{J}_j' \in \mathcal{J}} \frac{\sum_{j=1}^n \mathbb{I}[\hat{Y}_j=q, D_j=\mathcal{J}_j']}{\sum_{j=1}^n \mathbb{I}[D_j=\mathcal{J}_j']} \right\}, \\
F_{MEO} &:= \max_{q, q' \in \{0,1\}} \left\{ \max_{\mathcal{J}_j \in \mathcal{J}} \frac{\sum_{j=1}^n \mathbb{I}[\hat{Y}_j=q, Y_j=q', D_j=\mathcal{J}_j]}{\sum_{j=1}^n \mathbb{I}[D_j=\mathcal{J}_j, Y_j=q]} - \min_{\mathcal{J}_j' \in \mathcal{J}} \frac{\sum_{j=1}^n \mathbb{I}[\hat{Y}_j=q, Y_j=q', D_j=\mathcal{J}_j']}{\sum_{j=1}^n \mathbb{I}[D_j=\mathcal{J}_j', Y_j=q]} \right\}, \\
F_{IND} &:= \sum_{j=1}^{n-1} \sum_{l=j+1}^n [|f(X_j) - f(X_l)| - \delta \|X_j - X_l\|_2]_+,
\end{aligned}$$

where  $D$  is the demographic variable,  $\mathcal{J}$  is the set of subgroups with each subgroup  $\mathcal{J}_j \in \mathcal{J}$ .  $M$  is the set of detection models and  $F$  is the set of fairness metrics.  $F_{EO}$  measures the disparity in TPR and FPR between each subgroup and the overall population.  $F_{OAE}$  measures the maximum ACC gap across all demographic groups.  $F_{DP}$  measures the maximum difference in prediction rates across all demographic groups. And  $F_{MEO}$  captures the largest disparity in prediction outcomes (either positive or negative) when comparing different demographic groups.  $\delta$  in  $F_{IND}$  is a predefined scale factor (0.08 in our experiments).  $[\cdot]_+$  is the hinge function,  $\|\cdot\|_2$  is the  $\ell_2$  norm.  $f(X_j)$  represents the predicted logits of the model for input sample  $X_j$ .  $F_{IND}$  points that a model should be fair across individuals if similar individuals have similar predicted outcomes.

## D. More Fairness Benchmark Results and Analysis

### D.1. Detailed Results of Overall Performance Comparison

Detailed test results of each subgroup of each detector on AI-Face are presented in this section. Table D.1 provides comprehensive metrics of each subgroup on AI-Face. These results and findings align with the results reported in Table. 4 submitted main manuscript.

### D.2. Performance on Different Age Subgroups

We conduct an analysis of all detectors on age subgroups. 1) As shown in Fig. D.1, facial images with an age range of 0-14 (Child) are more often misclassified as fake, likely due to the underrepresentation of children in our dataset (see Fig. 3 (b)). This suggests detectors tend to show higher error rates for minority groups and show higher accuracy for the majority (Adult). 2) Among those detectors, EfficientB4, UnivFD, and PG-FDD demonstrate a smaller FPR gap between age subgroups, indicating these models may be less susceptible to age bias.

### D.3. Details of Post-Processing

In Section 4 we have applied 6 post-processing methods to evaluate detectors' robustness. Fig. D.2 visualizes the image after being applied different post-processing methods. We describe each post-processing method as follows:

**JPEG Compression:** Image compression introduces compression artifacts and reduces the image quality, simulating real-world scenarios where images may be of lower quality or have compression artifacts. In Fig. 6 we apply image compression with quality 80 to each image in the test set.

**Gaussian Blur:** This post-processing reduces image detail and noise by smoothing it through averaging pixel values with a Gaussian kernel. In Fig. 6 we apply gaussian blur with kernel size 7 to each image in the test set.

**Hue Saturation Value:** Alters the hue, saturation, and value of the image within specified limits. This post-processing technique is used to simulate variations in color and lighting conditions. Adjusting the hue changes the overall color tone, saturation controls the intensity of colors, and value adjusts the brightness. The results in Fig. 6 are after we adjust hue, saturation, and value with shifting limits 30.

**Random Brightness and Contrast:** This post-processing method adjusts the brightness and contrast of the image within specified limits. By applying random brightness and contrast variations, it introduces changes in the illumination and contrast

| Model Type        | Method              | Metric | Gender |       | Skin Tone |       |       | Age   |       |       |        |        | Intersection |       |       |       |       |       |
|-------------------|---------------------|--------|--------|-------|-----------|-------|-------|-------|-------|-------|--------|--------|--------------|-------|-------|-------|-------|-------|
|                   |                     |        | M      | F     | L         | M     | D     | Child | Young | Adult | Middle | Senior | M-L          | M-M   | M-D   | F-L   | F-M   | F-D   |
| Naive             | Xception<br>[82]    | AUC    | 98.90  | 98.20 | 97.69     | 98.44 | 98.88 | 95.95 | 97.86 | 99.10 | 98.66  | 96.54  | 97.88        | 98.70 | 99.22 | 97.53 | 98.17 | 98.19 |
|                   |                     | FPR    | 11.12  | 15.10 | 18.37     | 14.72 | 9.54  | 36.83 | 18.26 | 8.95  | 12.78  | 20.42  | 17.70        | 12.82 | 8.42  | 18.93 | 16.58 | 11.32 |
|                   |                     | TPR    | 99.38  | 99.22 | 98.94     | 99.62 | 98.43 | 99.55 | 99.38 | 99.21 | 99.49  | 98.51  | 98.55        | 99.64 | 98.87 | 99.16 | 99.59 | 97.58 |
|                   |                     | ACC    | 96.77  | 95.80 | 95.16     | 96.43 | 96.03 | 89.83 | 94.98 | 97.10 | 97.06  | 92.06  | 94.26        | 96.79 | 96.78 | 95.70 | 96.10 | 94.67 |
|                   | EfficientB4<br>[83] | AUC    | 98.86  | 98.31 | 99.23     | 98.94 | 97.59 | 99.63 | 98.61 | 98.44 | 98.82  | 98.69  | 99.01        | 99.10 | 98.36 | 99.39 | 98.78 | 95.94 |
|                   |                     | FPR    | 17.57  | 22.96 | 21.32     | 17.17 | 25.47 | 16.13 | 22.92 | 19.79 | 19.41  | 19.07  | 20.50        | 15.44 | 20.74 | 22.00 | 18.87 | 33.02 |
|                   |                     | TPR    | 99.04  | 98.56 | 99.49     | 99.02 | 98.19 | 99.56 | 98.89 | 98.55 | 99.14  | 98.66  | 99.22        | 99.25 | 98.60 | 99.64 | 98.81 | 97.40 |
|                   |                     | ACC    | 94.91  | 93.42 | 94.95     | 95.43 | 91.05 | 95.37 | 93.45 | 93.81 | 95.48  | 92.62  | 94.01        | 95.90 | 93.04 | 95.51 | 94.99 | 87.44 |
|                   | ViT-B/16<br>[84]    | AUC    | 99.02  | 98.26 | 97.50     | 98.77 | 98.49 | 95.55 | 98.23 | 98.98 | 98.80  | 97.28  | 97.21        | 99.03 | 99.03 | 97.80 | 98.50 | 97.21 |
|                   |                     | FPR    | 14.06  | 19.17 | 21.74     | 16.86 | 15.48 | 28.28 | 21.09 | 13.34 | 17.22  | 20.92  | 21.43        | 14.93 | 12.61 | 22.00 | 18.76 | 20.05 |
|                   |                     | TPR    | 98.43  | 97.51 | 96.75     | 98.23 | 97.36 | 94.58 | 97.88 | 98.14 | 98.40  | 96.16  | 96.77        | 98.56 | 98.21 | 96.74 | 97.93 | 95.72 |
|                   |                     | ACC    | 95.33  | 93.52 | 92.72     | 94.88 | 93.49 | 88.48 | 93.16 | 95.17 | 95.31  | 90.34  | 91.96        | 95.48 | 95.10 | 93.16 | 94.33 | 90.55 |
| Frequency         | F3Net<br>[85]       | AUC    | 99.09  | 98.24 | 98.51     | 98.68 | 98.79 | 96.05 | 98.17 | 99.15 | 98.97  | 97.40  | 98.66        | 99.00 | 99.27 | 98.30 | 98.36 | 97.80 |
|                   |                     | FPR    | 12.49  | 17.21 | 30.72     | 16.54 | 10.78 | 49.32 | 21.21 | 10.51 | 12.52  | 20.00  | 30.75        | 14.33 | 9.38  | 30.69 | 18.72 | 13.02 |
|                   |                     | TPR    | 99.15  | 99.00 | 99.69     | 99.41 | 98.11 | 99.77 | 99.40 | 99.00 | 99.06  | 97.96  | 99.55        | 99.34 | 98.76 | 99.76 | 99.48 | 96.86 |
|                   |                     | ACC    | 96.25  | 95.12 | 93.05     | 95.87 | 95.43 | 86.66 | 94.27 | 96.54 | 96.77  | 91.84  | 91.55        | 96.22 | 96.42 | 93.95 | 95.55 | 93.63 |
|                   | SPSL<br>[86]        | AUC    | 98.88  | 98.58 | 98.99     | 98.70 | 98.81 | 97.41 | 98.05 | 99.17 | 98.75  | 97.32  | 99.05        | 98.78 | 99.02 | 98.92 | 98.61 | 98.36 |
|                   |                     | FPR    | 11.62  | 16.03 | 19.50     | 14.77 | 11.44 | 37.20 | 20.20 | 9.58  | 13.12  | 19.07  | 18.94        | 12.88 | 9.57  | 19.95 | 16.62 | 14.43 |
|                   |                     | TPR    | 99.64  | 99.52 | 99.53     | 99.73 | 99.15 | 99.78 | 99.58 | 99.53 | 99.69  | 99.12  | 99.44        | 99.77 | 99.37 | 99.58 | 99.70 | 98.73 |
|                   |                     | ACC    | 96.84  | 95.80 | 95.38     | 96.51 | 95.96 | 89.90 | 94.65 | 97.17 | 97.16  | 92.92  | 94.59        | 96.88 | 96.80 | 95.85 | 96.17 | 94.42 |
|                   | SRM<br>[87]         | AUC    | 98.45  | 97.40 | 98.71     | 97.94 | 97.95 | 97.24 | 97.27 | 98.42 | 98.13  | 97.78  | 99.24        | 98.46 | 98.52 | 98.36 | 97.48 | 96.82 |
|                   |                     | FPR    | 12.84  | 19.11 | 22.30     | 17.50 | 12.30 | 36.76 | 22.42 | 11.92 | 15.33  | 19.64  | 18.94        | 14.70 | 9.92  | 25.06 | 20.25 | 16.10 |
|                   |                     | TPR    | 98.84  | 98.33 | 99.41     | 99.02 | 97.35 | 99.23 | 98.91 | 98.29 | 98.97  | 97.52  | 99.89        | 99.20 | 98.06 | 99.16 | 98.85 | 95.99 |
|                   |                     | ACC    | 95.93  | 94.16 | 94.67     | 95.35 | 94.44 | 89.62 | 93.59 | 95.65 | 96.14  | 91.67  | 94.91        | 96.03 | 95.76 | 94.53 | 94.72 | 92.03 |
| Spatial           | UCF<br>[26]         | AUC    | 98.62  | 97.45 | 97.20     | 97.92 | 98.49 | 95.59 | 97.26 | 98.74 | 98.67  | 97.04  | 97.67        | 98.44 | 99.00 | 96.88 | 97.41 | 97.47 |
|                   |                     | FPR    | 11.30  | 16.37 | 26.23     | 16.01 | 8.90  | 55.93 | 21.10 | 8.43  | 11.70  | 20.40  | 24.85        | 13.82 | 7.23  | 27.37 | 18.16 | 11.57 |
|                   |                     | TPR    | 98.20  | 97.77 | 98.75     | 98.37 | 96.89 | 99.53 | 98.50 | 97.58 | 98.35  | 96.91  | 99.00        | 98.47 | 97.63 | 98.61 | 98.28 | 95.45 |
|                   |                     | ACC    | 95.84  | 94.39 | 93.30     | 95.18 | 95.14 | 84.71 | 93.61 | 96.03 | 96.36  | 91.01  | 92.70        | 95.66 | 96.24 | 93.65 | 94.73 | 93.15 |
|                   | UnivFD<br>[88]      | AUC    | 98.55  | 97.76 | 98.38     | 98.47 | 97.40 | 98.13 | 98.07 | 98.33 | 98.11  | 96.94  | 98.24        | 98.76 | 98.13 | 98.46 | 98.19 | 95.84 |
|                   |                     | FPR    | 16.46  | 20.97 | 20.06     | 19.04 | 17.60 | 19.90 | 19.91 | 16.70 | 22.13  | 17.04  | 17.70        | 16.84 | 15.88 | 22.00 | 21.20 | 20.36 |
|                   |                     | TPR    | 98.02  | 97.12 | 97.57     | 98.26 | 95.69 | 97.43 | 97.40 | 97.39 | 98.41  | 94.49  | 97.10        | 98.54 | 96.99 | 97.83 | 98.02 | 93.17 |
|                   |                     | ACC    | 94.42  | 92.80 | 93.73     | 94.43 | 91.68 | 92.80 | 93.09 | 93.74 | 94.35  | 90.56  | 93.19        | 95.03 | 93.29 | 94.04 | 93.87 | 88.74 |
|                   | CORE<br>[89]        | AUC    | 99.04  | 98.01 | 97.80     | 98.47 | 98.79 | 95.88 | 97.82 | 99.09 | 98.77  | 97.11  | 98.12        | 98.91 | 99.26 | 97.57 | 98.02 | 97.84 |
|                   |                     | FPR    | 10.73  | 16.52 | 21.46     | 14.76 | 10.68 | 43.07 | 19.42 | 9.19  | 12.34  | 20.10  | 18.63        | 12.14 | 8.45  | 23.79 | 17.34 | 14.25 |
|                   |                     | TPR    | 99.40  | 99.27 | 99.61     | 99.51 | 98.84 | 99.83 | 99.27 | 99.27 | 99.46  | 99.00  | 99.78        | 99.53 | 99.13 | 99.52 | 99.49 | 98.28 |
|                   |                     | ACC    | 96.88  | 95.49 | 95.01     | 96.34 | 95.97 | 88.37 | 94.61 | 97.08 | 97.13  | 92.49  | 94.91        | 96.87 | 96.95 | 95.07 | 95.85 | 94.17 |
| Fairness-enhanced | DAW-FDD<br>[29]     | AUC    | 98.36  | 97.15 | 96.84     | 97.45 | 98.51 | 94.97 | 96.41 | 98.62 | 98.00  | 94.95  | 96.83        | 98.05 | 98.85 | 96.77 | 96.87 | 97.91 |
|                   |                     | FPR    | 14.12  | 19.63 | 26.93     | 18.59 | 12.81 | 56.69 | 23.64 | 11.23 | 15.40  | 26.17  | 26.40        | 16.16 | 10.80 | 27.37 | 20.98 | 16.03 |
|                   |                     | TPR    | 99.42  | 99.24 | 99.73     | 99.38 | 99.20 | 99.77 | 99.18 | 99.28 | 99.51  | 98.98  | 99.78        | 99.47 | 99.32 | 99.70 | 99.29 | 98.97 |
|                   |                     | ACC    | 96.05  | 94.73 | 93.91     | 95.39 | 95.58 | 84.69 | 93.49 | 96.56 | 96.56  | 90.41  | 92.86        | 95.90 | 96.41 | 94.53 | 94.91 | 94.06 |
|                   | DAG-FDD<br>[29]     | AUC    | 99.05  | 98.44 | 97.56     | 98.79 | 98.73 | 96.55 | 98.14 | 99.10 | 98.91  | 97.59  | 98.11        | 99.00 | 99.16 | 97.10 | 98.57 | 97.83 |
|                   |                     | FPR    | 12.11  | 18.02 | 20.76     | 15.10 | 14.21 | 26.95 | 20.01 | 11.72 | 14.61  | 22.40  | 18.32        | 13.04 | 10.58 | 22.76 | 17.14 | 20.00 |
|                   |                     | TPR    | 99.21  | 99.05 | 98.98     | 99.25 | 98.83 | 97.64 | 98.92 | 99.18 | 99.37  | 99.13  | 98.77        | 99.33 | 98.98 | 99.10 | 99.17 | 98.54 |
|                   |                     | ACC    | 96.39  | 94.97 | 94.67     | 96.06 | 94.90 | 91.07 | 94.20 | 96.36 | 96.61  | 91.79  | 94.26        | 96.51 | 96.23 | 94.92 | 95.65 | 92.47 |
|                   | PG-FDD<br>[30]      | AUC    | 99.36  | 98.94 | 98.94     | 99.18 | 99.13 | 98.83 | 98.89 | 99.35 | 99.27  | 97.85  | 98.97        | 99.35 | 99.39 | 98.89 | 99.02 | 98.51 |
|                   |                     | FPR    | 9.49   | 12.68 | 15.29     | 12.06 | 8.82  | 22.77 | 14.31 | 7.97  | 11.64  | 19.74  | 13.35        | 10.90 | 7.30  | 16.88 | 13.20 | 11.26 |
|                   |                     | TPR    | 98.73  | 98.21 | 98.63     | 98.85 | 97.43 | 99.11 | 98.44 | 98.28 | 98.87  | 97.74  | 98.66        | 99.02 | 98.12 | 98.61 | 98.69 | 96.10 |
|                   |                     | ACC    | 96.68  | 95.61 | 95.59     | 96.43 | 95.55 | 93.27 | 95.26 | 96.66 | 96.79  | 91.78  | 95.49        | 96.75 | 96.56 | 95.65 | 96.12 | 93.69 |

Table D.1. Detailed test results of each subgroup of each detector on the AI-Face. In the Skin Tone groups, ‘L’ represents Light (Tone 1-3), ‘M’ is Medium (4-6), ‘D’ is Dark (Tone 7-10).

levels of the images. This evaluates detector’s robustness to different illumination conditions. The results in Fig. 6 are after we adjust brightness and contrast with shifting limits 0.4.

**Random Crop:** Resizes the image to a specified size and then randomly crops a portion of it to the target dimensions. This post-processing method is used to evaluate the detector’s robustness to variations in the spatial content of the image. The results in Fig. 6 are after we randomly crop the image with target dimension of  $244 \times 244$ .

**Rotation:** Rotates the image within a specified angle limit. This post-processing method is used to evaluate the detector’s robustness to changes in the orientation of objects within the image. The results in Fig. 6 are after we randomly rotate the image within a range of -30 to 30 degrees.

#### D.4. Additional Fairness Robustness Evaluation Results

Fig. D.3 to Fig. D.7 demonstrate detectors’ robustness analysis in more detail as a function of different degrees of post-processing. Overall, ViT-B/16 [84] and UnivFD [88] show stronger robustness to various post-processing methods compared to other detection methods. Fairness-enhanced detectors do not have robustness against post-processing; this would be a direction for future studies to work on. Figure D.3 presents a detailed robustness analysis in terms of utility and fairness under varying degrees of JPEG compression. The utility of all detectors decreases as image quality is reduced. Among the detectors,



| Measure     | Attribute    | Metric    | Model Type       |                     |                  |               |              |             |             |                |              |                   |                 |                |
|-------------|--------------|-----------|------------------|---------------------|------------------|---------------|--------------|-------------|-------------|----------------|--------------|-------------------|-----------------|----------------|
|             |              |           | Native           |                     |                  | Frequency     |              |             | Spatial     |                |              | Fairness-enhanced |                 |                |
|             |              |           | Xception<br>[82] | EfficientB4<br>[83] | ViT-B/16<br>[84] | F3Net<br>[85] | SPSL<br>[86] | SRM<br>[87] | UCF<br>[26] | UnivFD<br>[88] | CORE<br>[89] | DAW-FDD<br>[29]   | DAG-FDD<br>[29] | PG-FDD<br>[30] |
| Fairness(%) | Skin Tone    | $F_{MEO}$ | 10.901           | 4.384               | 17.219           | 14.583        | 9.620        | 15.508      | 14.978      | 2.441          | 13.135       | 12.519            | 12.597          | 13.965         |
|             |              | $F_{DP}$  | 11.274           | 9.191               | 10.713           | 12.739        | 11.711       | 11.282      | 11.549      | 8.117          | 11.968       | 11.179            | 12.026          | 11.768         |
|             |              | $F_{OAE}$ | 2.434            | 3.609               | 2.276            | 2.232         | 2.814        | 1.780       | 1.950       | 2.940          | 1.658        | 0.878             | 1.753           | 1.439          |
|             |              | $F_{EO}$  | 0.160            | 0.093               | 0.205            | 0.209         | 0.156        | 0.191       | 0.186       | 0.034          | 0.176        | 0.165             | 0.176           | 0.176          |
|             | Gender       | $F_{MEO}$ | 5.475            | 5.458               | 8.003            | 5.749         | 5.754        | 5.848       | 5.575       | 3.244          | 4.367        | 5.186             | 5.808           | 4.086          |
|             |              | $F_{DP}$  | 1.205            | 1.412               | 2.416            | 1.340         | 1.445        | 1.959       | 1.810       | 0.781          | 0.980        | 1.715             | 1.470           | 1.545          |
|             |              | $F_{OAE}$ | 2.043            | 1.800               | 1.896            | 2.054         | 1.969        | 1.471       | 1.569       | 1.413          | 1.848        | 1.430             | 2.012           | 1.133          |
|             |              | $F_{EO}$  | 0.066            | 0.063               | 0.083            | 0.068         | 0.067        | 0.062       | 0.060       | 0.043          | 0.056        | 0.056             | 0.068           | 0.044          |
|             | Age          | $F_{MEO}$ | 28.244           | 7.460               | 38.521           | 27.860        | 24.768       | 40.542      | 44.342      | 8.584          | 34.156       | 36.450            | 35.031          | 36.197         |
|             |              | $F_{DP}$  | 11.228           | 12.245              | 12.140           | 11.395        | 11.466       | 14.564      | 15.856      | 16.134         | 13.525       | 12.256            | 13.478          | 12.082         |
|             |              | $F_{OAE}$ | 7.138            | 5.234               | 10.940           | 6.933         | 6.053        | 11.126      | 11.481      | 4.171          | 8.294        | 9.192             | 8.636           | 8.934          |
|             |              | $F_{EO}$  | 0.460            | 0.175               | 0.560            | 0.460         | 0.410        | 0.550       | 0.610       | 0.191          | 0.508        | 0.537             | 0.524           | 0.539          |
|             | Intersection | $F_{MEO}$ | 15.752           | 10.644              | 24.460           | 18.455        | 15.157       | 18.381      | 17.397      | 5.300          | 16.257       | 14.806            | 15.219          | 16.517         |
|             |              | $F_{DP}$  | 16.943           | 14.565              | 13.773           | 18.071        | 17.490       | 14.943      | 15.612      | 12.967         | 17.063       | 14.802            | 16.786          | 15.513         |
|             |              | $F_{OAE}$ | 6.805            | 8.029               | 5.025            | 6.658         | 7.200        | 3.614       | 3.532       | 6.226          | 5.079        | 3.314             | 5.757           | 2.989          |
|             |              | $F_{EO}$  | 0.355            | 0.307               | 0.441            | 0.440         | 0.366        | 0.382       | 0.382       | 0.178          | 0.371        | 0.336             | 0.399           | 0.354          |
| Utility(%)  | -            | AUC       | 0.968            | 0.968               | 0.981            | 0.966         | 0.968        | 0.967       | 0.977       | 0.979          | 0.975        | 0.970             | 0.973           | 0.978          |
|             |              | ACC       | 0.931            | 0.922               | 0.924            | 0.930         | 0.929        | 0.946       | 0.951       | 0.933          | 0.947        | 0.941             | 0.941           | 0.952          |
|             |              | AP        | 0.987            | 0.988               | 0.994            | 0.986         | 0.988        | 0.985       | 0.991       | 0.993          | 0.989        | 0.987             | 0.989           | 0.991          |
|             |              | EER       | 0.093            | 0.101               | 0.082            | 0.096         | 0.095        | 0.076       | 0.074       | 0.083          | 0.076        | 0.085             | 0.084           | 0.072          |
|             |              | FPR       | 0.205            | 0.219               | 0.290            | 0.199         | 0.190        | 0.205       | 0.163       | 0.188          | 0.144        | 0.186             | 0.168           | 0.151          |

Table D.2. Detailed fairness and utility evaluation results on 20% training subset.

| Measure     | Attribute    | Metric    | Model Type       |                     |                  |               |              |             |             |                |              |                   |                 |                |
|-------------|--------------|-----------|------------------|---------------------|------------------|---------------|--------------|-------------|-------------|----------------|--------------|-------------------|-----------------|----------------|
|             |              |           | Native           |                     |                  | Frequency     |              |             | Spatial     |                |              | Fairness-enhanced |                 |                |
|             |              |           | Xception<br>[82] | EfficientB4<br>[83] | ViT-B/16<br>[84] | F3Net<br>[85] | SPSL<br>[86] | SRM<br>[87] | UCF<br>[26] | UnivFD<br>[88] | CORE<br>[89] | DAW-FDD<br>[29]   | DAG-FDD<br>[29] | PG-FDD<br>[30] |
| Fairness(%) | Skin Tone    | $F_{MEO}$ | 9.815            | 4.414               | 12.194           | 10.801        | 9.275        | 24.037      | 12.299      | 2.568          | 15.734       | 12.628            | 10.463          | 10.982         |
|             |              | $F_{DP}$  | 10.080           | 10.413              | 9.475            | 11.137        | 10.644       | 12.550      | 10.632      | 8.322          | 11.251       | 10.157            | 10.456          | 10.928         |
|             |              | $F_{OAE}$ | 0.122            | 0.095               | 0.146            | 0.154         | 0.122        | 0.281       | 0.150       | 0.043          | 0.180        | 0.154             | 0.135           | 0.143          |
|             |              | $F_{EO}$  | 1.472            | 3.796               | 3.395            | 2.088         | 1.631        | 3.280       | 1.533       | 2.898          | 2.384        | 1.571             | 1.323           | 1.188          |
|             | Gender       | $F_{DP}$  | 5.576            | 3.592               | 6.089            | 5.985         | 4.368        | 7.959       | 4.400       | 3.438          | 5.234        | 5.960             | 4.797           | 5.390          |
|             |              | $F_{MEO}$ | 1.817            | 0.822               | 1.853            | 1.566         | 1.227        | 2.658       | 1.481       | 0.797          | 1.866        | 2.053             | 1.458           | 2.052          |
|             |              | $F_{OAE}$ | 1.559            | 1.622               | 1.829            | 1.966         | 1.595        | 1.722       | 1.338       | 1.507          | 1.369        | 1.473             | 1.530           | 1.303          |
|             |              | $F_{EO}$  | 0.060            | 0.047               | 0.067            | 0.069         | 0.052        | 0.080       | 0.049       | 0.045          | 0.055        | 0.062             | 0.055           | 0.055          |
|             | Age          | $F_{MEO}$ | 32.781           | 9.931               | 18.050           | 26.665        | 33.004       | 54.967      | 43.829      | 7.840          | 38.202       | 41.707            | 34.285          | 33.582         |
|             |              | $F_{DP}$  | 12.161           | 12.428              | 14.762           | 10.954        | 13.272       | 16.006      | 14.243      | 16.076         | 13.394       | 13.661            | 11.630          | 12.955         |
|             |              | $F_{OAE}$ | 8.535            | 4.312               | 6.949            | 6.831         | 8.210        | 14.795      | 11.248      | 4.185          | 9.906        | 10.841            | 8.738           | 8.520          |
|             |              | $F_{EO}$  | 0.474            | 0.235               | 0.348            | 0.432         | 0.470        | 0.738       | 0.611       | 0.179          | 0.541        | 0.585             | 0.509           | 0.500          |
|             | Intersection | $F_{MEO}$ | 13.451           | 8.558               | 15.615           | 13.559        | 12.356       | 30.133      | 15.278      | 5.585          | 19.342       | 17.006            | 12.784          | 13.197         |
|             |              | $F_{DP}$  | 13.795           | 16.478              | 14.409           | 16.096        | 15.138       | 15.893      | 14.797      | 13.263         | 15.123       | 14.586            | 14.345          | 15.166         |
|             |              | $F_{OAE}$ | 4.424            | 7.462               | 5.221            | 6.173         | 4.728        | 5.030       | 2.886       | 6.298          | 3.741        | 3.541             | 4.402           | 2.911          |
|             |              | $F_{EO}$  | 0.312            | 0.236               | 0.416            | 0.360         | 0.309        | 0.550       | 0.304       | 0.185          | 0.374        | 0.324             | 0.310           | 0.301          |
| Utility(%)  | -            | AUC       | 0.979            | 0.976               | 0.980            | 0.974         | 0.982        | 0.957       | 0.979       | 0.979          | 0.981        | 0.976             | 0.978           | 0.982          |
|             |              | ACC       | 0.951            | 0.940               | 0.933            | 0.937         | 0.951        | 0.938       | 0.955       | 0.934          | 0.957        | 0.948             | 0.949           | 0.960          |
|             |              | AP        | 0.991            | 0.991               | 0.993            | 0.989         | 0.993        | 0.983       | 0.992       | 0.993          | 0.991        | 0.989             | 0.991           | 0.992          |
|             |              | EER       | 0.068            | 0.078               | 0.081            | 0.083         | 0.066        | 0.117       | 0.072       | 0.082          | 0.058        | 0.074             | 0.074           | 0.055          |
|             |              | FPR       | 0.165            | 0.147               | 0.136            | 0.186         | 0.147        | 0.245       | 0.157       | 0.180          | 0.151        | 0.184             | 0.169           | 0.130          |

Table D.3. Detailed fairness and utility evaluation results on 40% training subset.

ViT-B/16 [84] exhibits the highest utility robustness, ViT-B/16 [84] and UnivFD [88] both demonstrate the strongest fairness robustness. When considering Gaussian blur, ViT-B/16 again stands out as the most robust detector in terms of utility, whereas DAW-FDD [29] and UnivFD [88] show the great robustness in terms of fairness. Against Hue Saturation Value adjustments, SPSL [86] shows the strongest utility robustness, while the fairness of DAW-FDD [29] fluctuates less with different Hue Saturation Value adjustments. ViT-B/16 demonstrates superior robustness in both utility and fairness when facing rotations. For brightness contrast variations, SPSL [86] is the most robust detector in terms of utility, while UnivFD once again shows superior robustness in terms of fairness. Last, we can get the same conclusion from Fig. D.3 to Fig. D.7 as in the main manuscript, that post-processing clearly impairs detectors' utility but does not necessarily make detectors more biased.

## D.5. Full Results of Effect of Increasing the Size of Train Set

In this section, we provide the full evaluation results tested under different sizes of train set, as shown from Table D.2 to Table D.5. Intersection  $F_{EO}$  and AUC align with the results in Fig. 7 of the submitted manuscript.

| Measure     | Attribute    | Metric    | Model Type       |                     |                  |               |              |             |             |                |              |                   |                 |                |
|-------------|--------------|-----------|------------------|---------------------|------------------|---------------|--------------|-------------|-------------|----------------|--------------|-------------------|-----------------|----------------|
|             |              |           | Native           |                     |                  | Frequency     |              |             | Spatial     |                |              | Fairness-enhanced |                 |                |
|             |              |           | Xception<br>[82] | EfficientB4<br>[83] | ViT-B/16<br>[84] | F3Net<br>[85] | SPSL<br>[86] | SRM<br>[87] | UCF<br>[26] | UnivFD<br>[88] | CORE<br>[89] | DAW-FDD<br>[29]   | DAG-FDD<br>[29] | PG-FDD<br>[30] |
| Fairness(%) | Skin Tone    | $F_{MEO}$ | 9.086            | 14.704              | 4.388            | 15.303        | 6.813        | 14.516      | 14.952      | 2.186          | 9.689        | 13.488            | 9.672           | 4.108          |
|             |              | $F_{DP}$  | 10.232           | 11.784              | 7.714            | 11.225        | 9.979        | 14.909      | 13.116      | 8.004          | 10.666       | 10.844            | 10.054          | 8.575          |
|             |              | $F_{OAE}$ | 1.531            | 2.017               | 2.572            | 2.320         | 1.247        | 1.733       | 1.562       | 2.777          | 1.208        | 1.664             | 1.259           | 1.383          |
|             |              | $F_{EO}$  | 0.124            | 0.194               | 0.084            | 0.177         | 0.100        | 0.234       | 0.208       | 0.043          | 0.131        | 0.163             | 0.125           | 0.055          |
|             | Gender       | $F_{MEO}$ | 4.418            | 6.743               | 8.445            | 5.545         | 5.242        | 7.331       | 5.713       | 4.182          | 4.395        | 5.579             | 4.978           | 2.430          |
|             |              | $F_{DP}$  | 1.243            | 2.063               | 2.697            | 2.096         | 1.736        | 3.656       | 1.845       | 1.142          | 1.622        | 2.153             | 1.600           | 1.061          |
|             |              | $F_{OAE}$ | 1.567            | 1.846               | 2.052            | 1.318         | 1.499        | 0.630       | 1.651       | 1.489          | 1.217        | 1.267             | 1.470           | 0.858          |
|             |              | $F_{EO}$  | 0.053            | 0.072               | 0.086            | 0.057         | 0.057        | 0.087       | 0.062       | 0.050          | 0.048        | 0.056             | 0.055           | 0.029          |
|             | Age          | $F_{MEO}$ | 35.231           | 27.998              | 17.573           | 42.366        | 35.428       | 37.043      | 34.243      | 5.520          | 28.666       | 40.326            | 38.409          | 24.355         |
|             |              | $F_{DP}$  | 12.874           | 12.663              | 11.691           | 15.070        | 12.924       | 16.570      | 13.579      | 15.256         | 11.264       | 13.929            | 13.112          | 10.449         |
|             |              | $F_{OAE}$ | 8.954            | 7.379               | 7.004            | 10.921        | 8.915        | 8.078       | 8.232       | 3.900          | 7.519        | 10.379            | 9.909           | 6.870          |
|             |              | $F_{EO}$  | 0.514            | 0.411               | 0.320            | 0.585         | 0.519        | 0.528       | 0.520       | 0.134          | 0.438        | 0.570             | 0.558           | 0.362          |
|             | Intersection | $F_{MEO}$ | 11.554           | 18.923              | 10.063           | 18.907        | 10.175       | 20.404      | 18.818      | 5.414          | 12.995       | 15.944            | 12.552          | 5.425          |
|             |              | $F_{DP}$  | 14.625           | 15.884              | 9.908            | 15.240        | 14.093       | 18.967      | 18.087      | 12.890         | 15.331       | 14.584            | 13.949          | 13.379         |
|             |              | $F_{OAE}$ | 4.755            | 4.997               | 5.459            | 3.617         | 4.210        | 2.965       | 4.832       | 6.152          | 3.747        | 3.106             | 4.102           | 3.306          |
|             |              | $F_{EO}$  | 0.279            | 0.405               | 0.311            | 0.362         | 0.251        | 0.477       | 0.431       | 0.200          | 0.276        | 0.331             | 0.282           | 0.159          |
| Utility(%)  | -            | AUC       | 0.976            | 0.980               | 0.986            | 0.981         | 0.983        | 0.976       | 0.981       | 0.981          | 0.982        | 0.977             | 0.982           | 0.982          |
|             |              | ACC       | 0.948            | 0.945               | 0.943            | 0.961         | 0.952        | 0.927       | 0.951       | 0.935          | 0.956        | 0.960             | 0.950           | 0.960          |
|             |              | AP        | 0.989            | 0.992               | 0.996            | 0.991         | 0.993        | 0.991       | 0.992       | 0.994          | 0.992        | 0.987             | 0.993           | 0.991          |
|             |              | EER       | 0.074            | 0.071               | 0.065            | 0.058         | 0.067        | 0.092       | 0.068       | 0.078          | 0.062        | 0.060             | 0.069           | 0.058          |
|             |              | FPR       | 0.166            | 0.183               | 0.177            | 0.137         | 0.154        | 0.137       | 0.137       | 0.198          | 0.145        | 0.143             | 0.172           | 0.127          |

Table D.4. Detailed fairness and utility evaluation results on 60% training subset.

| Measure     | Attribute    | Metric    | Model Type       |                     |                  |               |              |             |             |                |              |                   |                 |                |
|-------------|--------------|-----------|------------------|---------------------|------------------|---------------|--------------|-------------|-------------|----------------|--------------|-------------------|-----------------|----------------|
|             |              |           | Native           |                     |                  | Frequency     |              |             | Spatial     |                |              | Fairness-enhanced |                 |                |
|             |              |           | Xception<br>[82] | EfficientB4<br>[83] | ViT-B/16<br>[84] | F3Net<br>[85] | SPSL<br>[86] | SRM<br>[87] | UCF<br>[26] | UnivFD<br>[88] | CORE<br>[89] | DAW-FDD<br>[29]   | DAG-FDD<br>[29] | PG-FDD<br>[30] |
| Fairness(%) | Skin Tone    | $F_{MEO}$ | 15.463           | 6.826               | 7.442            | 13.642        | 4.221        | 9.425       | 13.574      | 2.368          | 13.487       | 10.127            | 8.763           | 7.613          |
|             |              | $F_{DP}$  | 11.994           | 10.440              | 8.378            | 11.211        | 8.998        | 6.875       | 11.085      | 8.231          | 11.506       | 10.182            | 8.920           | 11.914         |
|             |              | $F_{OAE}$ | 1.998            | 2.390               | 1.540            | 1.713         | 2.141        | 7.511       | 1.661       | 2.777          | 1.538        | 1.375             | 1.484           | 1.822          |
|             |              | $F_{EO}$  | 0.192            | 0.107               | 0.095            | 0.171         | 0.064        | 0.187       | 0.168       | 0.036          | 0.170        | 0.119             | 0.114           | 0.129          |
|             | Gender       | $F_{MEO}$ | 4.209            | 3.639               | 9.461            | 5.189         | 4.116        | 2.328       | 5.402       | 4.084          | 5.058        | 4.112             | 4.143           | 4.035          |
|             |              | $F_{DP}$  | 1.171            | 1.043               | 3.025            | 1.749         | 1.191        | 2.803       | 1.778       | 1.082          | 1.899        | 1.537             | 1.560           | 1.401          |
|             |              | $F_{OAE}$ | 1.579            | 1.395               | 2.163            | 1.499         | 1.507        | 1.248       | 1.560       | 1.519          | 1.277        | 1.218             | 1.158           | 1.353          |
|             |              | $F_{EO}$  | 0.051            | 0.045               | 0.095            | 0.057         | 0.050        | 0.037       | 0.059       | 0.050          | 0.053        | 0.045             | 0.045           | 0.046          |
|             | Age          | $F_{MEO}$ | 33.930           | 16.272              | 10.222           | 45.076        | 20.048       | 11.857      | 45.508      | 5.788          | 37.055       | 30.409            | 29.707          | 20.058         |
|             |              | $F_{DP}$  | 15.167           | 11.254              | 11.643           | 15.938        | 11.379       | 8.360       | 15.357      | 15.620         | 13.565       | 11.925            | 9.880           | 10.487         |
|             |              | $F_{OAE}$ | 8.520            | 4.738               | 5.662            | 11.409        | 5.123        | 10.447      | 11.546      | 3.777          | 9.454        | 7.784             | 8.513           | 4.450          |
|             |              | $F_{EO}$  | 0.488            | 0.286               | 0.231            | 0.623         | 0.322        | 0.228       | 0.625       | 0.136          | 0.526        | 0.441             | 0.459           | 0.357          |
|             | Intersection | $F_{MEO}$ | 19.488           | 11.396              | 16.807           | 15.829        | 6.631        | 12.599      | 16.926      | 5.116          | 16.594       | 13.597            | 11.226          | 10.523         |
|             |              | $F_{DP}$  | 17.093           | 15.841              | 11.946           | 15.708        | 13.376       | 11.010      | 15.607      | 13.121         | 15.834       | 14.758            | 12.474          | 16.906         |
|             |              | $F_{OAE}$ | 3.583            | 5.700               | 5.469            | 3.139         | 5.452        | 10.020      | 2.878       | 6.209          | 2.852        | 2.313             | 2.755           | 4.348          |
|             |              | $F_{EO}$  | 0.392            | 0.262               | 0.340            | 0.349         | 0.225        | 0.420       | 0.342       | 0.188          | 0.345        | 0.254             | 0.226           | 0.294          |
| Utility(%)  | -            | AUC       | 0.985            | 0.985               | 0.987            | 0.981         | 0.984        | 0.979       | 0.982       | 0.981          | 0.984        | 0.981             | 0.987           | 0.988          |
|             |              | ACC       | 0.950            | 0.949               | 0.940            | 0.958         | 0.950        | 0.816       | 0.956       | 0.936          | 0.959        | 0.963             | 0.960           | 0.953          |
|             |              | AP        | 0.994            | 0.994               | 0.996            | 0.992         | 0.994        | 0.992       | 0.993       | 0.994          | 0.993        | 0.989             | 0.995           | 0.996          |
|             |              | EER       | 0.065            | 0.064               | 0.062            | 0.069         | 0.064        | 0.066       | 0.068       | 0.078          | 0.060        | 0.053             | 0.057           | 0.058          |
|             |              | FPR       | 0.145            | 0.162               | 0.206            | 0.134         | 0.148        | 0.039       | 0.141       | 0.189          | 0.138        | 0.118             | 0.144           | 0.099          |

Table D.5. Detailed fairness and utility evaluation results on 80% training subset.

## D.6. Full Results of Effect of the Ratio of Real and Fake

In this section, we provide the full evaluation results tested under the train set with different ratios of real and fake, as shown from Table D.6 to Table D.8. Intersection  $F_{EO}$  and AUC align with the results in Fig. 7 of the submitted manuscript.

## D.7. Comparison Results with Foundation Model

In the Discussion (Section 5.3) of the main manuscript, we highlighted the potential of integrating foundation models (e.g., CLIP) into detector design as a strategy for mitigating bias. To explore this, we conducted a preliminary experiment by designing a detector using a frozen CLIP model combined with a trainable 3-layer MLP. This model was trained and tested on the AI-Face dataset. For comparison, we selected one representative detector from each model type: EfficientB4 [83], SPSL [86], UnivFD [88], and PG-FDD [30]. These four detectors' results are consistent with those reported in Table 4. As shown in Table D.9, the CLIP+MLP detector demonstrates a clear advantage in both fairness and utility metrics, suggesting that foundation models hold significant promise for bias mitigation. For instance, its  $F_{EO}$  score is 3.11% lower than the

| Measure     | Attribute    | Metric    | Model Type       |                     |                  |               |              |             |             |                |              |                   |                 |                |
|-------------|--------------|-----------|------------------|---------------------|------------------|---------------|--------------|-------------|-------------|----------------|--------------|-------------------|-----------------|----------------|
|             |              |           | Native           |                     |                  | Frequency     |              |             | Spatial     |                |              | Fairness-enhanced |                 |                |
|             |              |           | Xception<br>[82] | EfficientB4<br>[83] | ViT-B/16<br>[84] | F3Net<br>[85] | SPSL<br>[86] | SRM<br>[87] | UCF<br>[26] | UnivFD<br>[88] | CORE<br>[89] | DAW-FDD<br>[29]   | DAG-FDD<br>[29] | PG-FDD<br>[30] |
| Fairness(%) | Skin Tone    | $F_{MEO}$ | 9.750            | 11.908              | 5.095            | 12.896        | 5.859        | 18.083      | 10.363      | 5.926          | 10.955       | 9.570             | 8.980           | 3.889          |
|             |              | $F_{DP}$  | 16.824           | 14.637              | 12.547           | 17.621        | 14.479       | 19.676      | 15.803      | 8.744          | 16.109       | 16.063            | 15.700          | 12.899         |
|             |              | $F_{OAE}$ | 2.401            | 2.973               | 1.714            | 3.630         | 0.905        | 5.752       | 3.249       | 5.302          | 3.524        | 2.641             | 2.684           | 1.164          |
|             |              | $F_{EO}$  | 0.164            | 0.155               | 0.119            | 0.183         | 0.113        | 0.248       | 0.147       | 0.083          | 0.149        | 0.142             | 0.132           | 0.069          |
|             | Gender       | $F_{MEO}$ | 3.535            | 0.952               | 4.275            | 4.788         | 4.439        | 4.201       | 4.655       | 6.898          | 3.981        | 3.848             | 3.674           | 3.792          |
|             |              | $F_{DP}$  | 2.241            | 0.715               | 3.129            | 3.184         | 3.060        | 2.245       | 3.426       | 4.328          | 2.850        | 2.562             | 2.514           | 2.790          |
|             |              | $F_{OAE}$ | 2.482            | 0.833               | 2.263            | 2.690         | 2.496        | 2.920       | 2.332       | 3.028          | 2.236        | 2.451             | 2.360           | 2.166          |
|             |              | $F_{EO}$  | 0.051            | 0.011               | 0.047            | 0.057         | 0.052        | 0.062       | 0.049       | 0.070          | 0.048        | 0.051             | 0.049           | 0.045          |
|             | Age          | $F_{MEO}$ | 23.282           | 14.195              | 13.627           | 32.679        | 26.796       | 52.939      | 30.332      | 8.251          | 32.612       | 23.934            | 23.834          | 15.408         |
|             |              | $F_{DP}$  | 17.521           | 18.304              | 16.426           | 20.437        | 18.489       | 28.303      | 18.892      | 12.343         | 19.913       | 17.103            | 18.221          | 15.255         |
|             |              | $F_{OAE}$ | 11.063           | 3.474               | 9.185            | 16.411        | 13.102       | 26.805      | 15.234      | 6.602          | 16.794       | 11.909            | 11.523          | 7.893          |
|             |              | $F_{EO}$  | 0.381            | 0.203               | 0.303            | 0.490         | 0.436        | 0.769       | 0.472       | 0.162          | 0.469        | 0.378             | 0.370           | 0.273          |
|             | Intersection | $F_{MEO}$ | 11.921           | 17.564              | 7.727            | 17.622        | 10.201       | 21.679      | 15.031      | 12.980         | 12.775       | 13.010            | 11.104          | 7.173          |
|             |              | $F_{DP}$  | 23.484           | 21.311              | 17.501           | 23.519        | 21.115       | 24.119      | 22.167      | 13.434         | 21.787       | 22.542            | 22.120          | 18.247         |
|             |              | $F_{OAE}$ | 4.000            | 4.650               | 3.969            | 5.957         | 4.306        | 9.974       | 5.003       | 11.530         | 5.750        | 3.903             | 4.600           | 4.426          |
|             |              | $F_{EO}$  | 0.344            | 0.335               | 0.304            | 0.378         | 0.250        | 0.515       | 0.324       | 0.270          | 0.325        | 0.290             | 0.303           | 0.196          |
| Utility(%)  | -            | AUC       | 0.984            | 0.984               | 0.984            | 0.982         | 0.982        | 0.935       | 0.981       | 0.979          | 0.986        | 0.983             | 0.987           | 0.989          |
|             |              | ACC       | 0.937            | 0.892               | 0.922            | 0.928         | 0.929        | 0.900       | 0.930       | 0.830          | 0.933        | 0.937             | 0.944           | 0.940          |
|             |              | AP        | 0.980            | 0.986               | 0.986            | 0.977         | 0.978        | 0.910       | 0.977       | 0.980          | 0.982        | 0.980             | 0.984           | 0.987          |
|             |              | EER       | 0.062            | 0.064               | 0.067            | 0.061         | 0.066        | 0.129       | 0.065       | 0.082          | 0.056        | 0.061             | 0.053           | 0.052          |
|             |              | FPR       | 0.087            | 0.005               | 0.111            | 0.122         | 0.111        | 0.164       | 0.116       | 0.337          | 0.115        | 0.095             | 0.083           | 0.095          |

Table D.6. Detailed fairness and utility evaluation results on a training subset with the ratio of real vs fake is 1:1.

| Measure     | Attribute    | Metric    | Model Type       |                     |                  |               |              |             |             |                |              |                   |                 |                |
|-------------|--------------|-----------|------------------|---------------------|------------------|---------------|--------------|-------------|-------------|----------------|--------------|-------------------|-----------------|----------------|
|             |              |           | Native           |                     |                  | Frequency     |              |             | Spatial     |                |              | Fairness-enhanced |                 |                |
|             |              |           | Xception<br>[82] | EfficientB4<br>[83] | ViT-B/16<br>[84] | F3Net<br>[85] | SPSL<br>[86] | SRM<br>[87] | UCF<br>[26] | UnivFD<br>[88] | CORE<br>[89] | DAW-FDD<br>[29]   | DAG-FDD<br>[29] | PG-FDD<br>[30] |
| Fairness(%) | Skin Tone    | $F_{MEO}$ | 11.678           | 10.565              | 8.595            | 12.629        | 11.790       | 17.068      | 9.661       | 5.615          | 11.138       | 11.726            | 8.680           | 6.435          |
|             |              | $F_{DP}$  | 14.133           | 12.859              | 10.579           | 15.157        | 13.983       | 16.962      | 14.081      | 8.438          | 14.161       | 14.724            | 13.388          | 13.256         |
|             |              | $F_{OAE}$ | 4.539            | 3.671               | 4.407            | 4.104         | 4.894        | 5.036       | 3.931       | 5.461          | 4.389        | 3.379             | 3.006           | 2.232          |
|             |              | $F_{EO}$  | 0.128            | 0.151               | 0.102            | 0.148         | 0.127        | 0.200       | 0.107       | 0.081          | 0.121        | 0.141             | 0.103           | 0.081          |
|             | Gender       | $F_{MEO}$ | 6.942            | 2.295               | 10.586           | 7.818         | 7.327        | 8.990       | 6.054       | 6.525          | 7.518        | 6.259             | 5.934           | 4.944          |
|             |              | $F_{DP}$  | 4.378            | 0.094               | 6.203            | 4.881         | 4.632        | 5.572       | 4.086       | 4.136          | 4.867        | 4.093             | 3.917           | 3.565          |
|             |              | $F_{OAE}$ | 3.225            | 1.508               | 4.799            | 3.669         | 3.303        | 4.060       | 2.906       | 2.842          | 3.445        | 2.890             | 2.795           | 2.407          |
|             |              | $F_{EO}$  | 0.072            | 0.023               | 0.106            | 0.080         | 0.074        | 0.091       | 0.063       | 0.067          | 0.075        | 0.065             | 0.062           | 0.052          |
|             | Age          | $F_{MEO}$ | 36.384           | 13.175              | 25.574           | 35.508        | 30.942       | 36.806      | 32.134      | 6.629          | 34.717       | 32.860            | 29.474          | 28.923         |
|             |              | $F_{DP}$  | 18.815           | 19.006              | 16.522           | 18.393        | 17.007       | 18.947      | 17.086      | 12.524         | 18.454       | 16.798            | 15.004          | 19.634         |
|             |              | $F_{OAE}$ | 19.144           | 2.128               | 14.899           | 18.668        | 16.331       | 19.294      | 16.714      | 6.598          | 18.249       | 17.426            | 15.605          | 15.099         |
|             |              | $F_{EO}$  | 0.524            | 0.193               | 0.373            | 0.525         | 0.442        | 0.553       | 0.490       | 0.147          | 0.507        | 0.482             | 0.447           | 0.420          |
|             | Intersection | $F_{MEO}$ | 16.037           | 18.196              | 19.081           | 16.394        | 19.895       | 21.535      | 13.589      | 12.135         | 15.921       | 14.772            | 12.424          | 10.340         |
|             |              | $F_{DP}$  | 16.749           | 17.705              | 16.207           | 17.525        | 18.313       | 19.312      | 17.029      | 12.639         | 17.144       | 16.813            | 15.850          | 16.846         |
|             |              | $F_{OAE}$ | 7.914            | 4.565               | 12.301           | 6.936         | 8.704        | 9.372       | 5.877       | 11.469         | 7.025        | 5.523             | 6.909           | 5.109          |
|             |              | $F_{EO}$  | 0.381            | 0.346               | 0.400            | 0.399         | 0.394        | 0.467       | 0.317       | 0.249          | 0.364        | 0.336             | 0.313           | 0.243          |
| Utility(%)  | -            | AUC       | 0.958            | 0.967               | 0.975            | 0.966         | 0.964        | 0.951       | 0.976       | 0.978          | 0.969        | 0.962             | 0.967           | 0.983          |
|             |              | ACC       | 0.864            | 0.864               | 0.823            | 0.876         | 0.855        | 0.862       | 0.909       | 0.829          | 0.888        | 0.874             | 0.882           | 0.925          |
|             |              | AP        | 0.934            | 0.972               | 0.976            | 0.948         | 0.946        | 0.938       | 0.964       | 0.979          | 0.952        | 0.942             | 0.951           | 0.977          |
|             |              | EER       | 0.087            | 0.098               | 0.091            | 0.082         | 0.081        | 0.116       | 0.064       | 0.085          | 0.073        | 0.084             | 0.079           | 0.056          |
|             |              | FPR       | 0.267            | 0.012               | 0.349            | 0.242         | 0.285        | 0.272       | 0.172       | 0.339          | 0.221        | 0.246             | 0.227           | 0.142          |

Table D.7. Detailed fairness and utility evaluation results on a training subset with the ratio of real vs fake is 1:10.

second-best method, PG-FDD, for the Skin Tone group, and 14.046% lower for the Intersection group.

| Measure     | Attribute    | Metric    | Model Type       |                     |                  |               |              |             |             |                |              |                   |                 |                |
|-------------|--------------|-----------|------------------|---------------------|------------------|---------------|--------------|-------------|-------------|----------------|--------------|-------------------|-----------------|----------------|
|             |              |           | Native           |                     |                  | Frequency     |              |             | Spatial     |                |              | Fairness-enhanced |                 |                |
|             |              |           | Xception<br>[82] | EfficientB4<br>[83] | ViT-B/16<br>[84] | F3Net<br>[85] | SPSL<br>[86] | SRM<br>[87] | UCF<br>[26] | UnivFD<br>[88] | CORE<br>[89] | DAW-FDD<br>[29]   | DAG-FDD<br>[29] | PG-FDD<br>[30] |
| Fairness(%) | Skin Tone    | $F_{MEO}$ | 6.557            | 11.357              | 7.743            | 7.364         | 5.850        | 18.290      | 5.814       | 12.493         | 6.397        | 5.083             | 6.515           | 5.122          |
|             |              | $F_{DP}$  | 13.087           | 13.112              | 12.348           | 15.751        | 11.728       | 22.766      | 14.881      | 13.771         | 14.364       | 12.265            | 15.536          | 12.718         |
|             |              | $F_{OAE}$ | 1.779            | 2.939               | 1.589            | 1.352         | 2.402        | 3.823       | 1.495       | 2.386          | 0.996        | 1.401             | 1.471           | 1.742          |
|             |              | $F_{EO}$  | 0.108            | 0.140               | 0.093            | 0.153         | 0.090        | 0.331       | 0.135       | 0.155          | 0.125        | 0.084             | 0.143           | 0.096          |
|             | Gender       | $F_{MEO}$ | 1.808            | 1.803               | 2.106            | 1.659         | 2.316        | 3.035       | 3.035       | 1.997          | 3.499        | 1.920             | 1.812           | 3.016          |
|             |              | $F_{DP}$  | 1.769            | 0.136               | 0.369            | 1.321         | 0.470        | 2.871       | 2.503       | 2.008          | 2.119        | 1.097             | 1.405           | 2.633          |
|             |              | $F_{OAE}$ | 1.385            | 1.269               | 1.615            | 1.661         | 1.777        | 1.270       | 1.817       | 0.579          | 2.662        | 1.928             | 1.734           | 1.677          |
|             |              | $F_{EO}$  | 0.025            | 0.018               | 0.027            | 0.032         | 0.032        | 0.038       | 0.035       | 0.020          | 0.052        | 0.036             | 0.033           | 0.033          |
|             | Age          | $F_{MEO}$ | 8.571            | 11.954              | 9.832            | 8.680         | 9.523        | 36.509      | 11.812      | 10.258         | 13.180       | 8.539             | 9.553           | 11.109         |
|             |              | $F_{DP}$  | 17.740           | 18.338              | 18.662           | 17.788        | 18.910       | 27.851      | 16.998      | 16.446         | 16.719       | 18.069            | 18.034          | 16.696         |
|             |              | $F_{OAE}$ | 3.191            | 0.656               | 1.405            | 4.291         | 2.010        | 12.139      | 5.174       | 2.737          | 5.723        | 3.924             | 4.283           | 4.859          |
|             |              | $F_{EO}$  | 0.196            | 0.157               | 0.141            | 0.228         | 0.174        | 0.685       | 0.281       | 0.173          | 0.288        | 0.209             | 0.240           | 0.246          |
|             | Intersection | $F_{MEO}$ | 11.785           | 18.146              | 14.840           | 14.116        | 12.940       | 23.975      | 11.313      | 16.240         | 12.729       | 10.948            | 13.399          | 9.441          |
|             |              | $F_{DP}$  | 20.192           | 17.674              | 19.309           | 23.135        | 18.594       | 29.625      | 22.394      | 19.583         | 21.935       | 18.674            | 23.584          | 17.906         |
|             |              | $F_{OAE}$ | 3.419            | 4.233               | 3.638            | 4.263         | 4.020        | 5.166       | 3.479       | 3.133          | 4.945        | 3.388             | 3.885           | 3.667          |
|             |              | $F_{EO}$  | 0.251            | 0.312               | 0.256            | 0.329         | 0.232        | 0.678       | 0.305       | 0.307          | 0.285        | 0.225             | 0.314           | 0.232          |
| Utility(%)  | -            | AUC       | 0.978            | 0.973               | 0.982            | 0.979         | 0.982        | 0.933       | 0.978       | 0.975          | 0.979        | 0.980             | 0.982           | 0.983          |
|             |              | ACC       | 0.920            | 0.862               | 0.895            | 0.928         | 0.916        | 0.832       | 0.921       | 0.849          | 0.921        | 0.920             | 0.930           | 0.933          |
|             |              | AP        | 0.978            | 0.977               | 0.984            | 0.978         | 0.984        | 0.915       | 0.979       | 0.978          | 0.978        | 0.979             | 0.981           | 0.984          |
|             |              | EER       | 0.070            | 0.088               | 0.075            | 0.066         | 0.064        | 0.141       | 0.076       | 0.087          | 0.074        | 0.070             | 0.065           | 0.066          |
|             |              | FPR       | 0.034            | 0.008               | 0.009            | 0.042         | 0.018        | 0.116       | 0.054       | 0.004          | 0.055        | 0.037             | 0.040           | 0.051          |

Table D.8. Detailed fairness and utility evaluation results on a training subset with the ratio of real vs fake is 10:1.

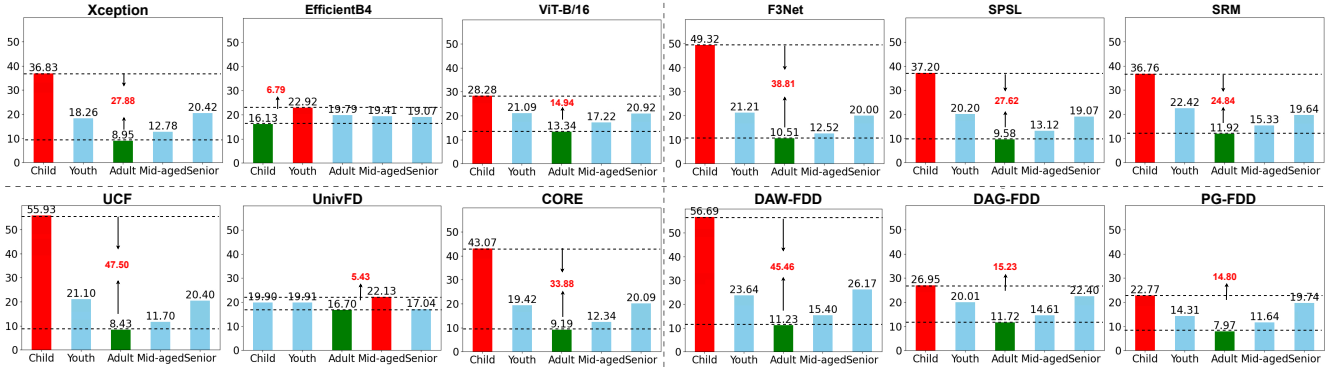

Figure D.1. FPR(%) of each age subgroup. The subgroup with the highest FPR score is highlighted in red, while the subgroup with the lowest FPR score is shown in green.

| Method      | Fairness     |              |              |              |              |              |              |              |              |               |              |              | Utility      |              |              |              |               |
|-------------|--------------|--------------|--------------|--------------|--------------|--------------|--------------|--------------|--------------|---------------|--------------|--------------|--------------|--------------|--------------|--------------|---------------|
|             | Skin Tone    |              |              |              | Gender       |              |              |              | Age          |               |              |              | Intersection |              |              |              | -             |
|             | $F_{MEO}$    | $F_{DP}$     | $F_{OAE}$    | $F_{EO}$     | $F_{MEO}$    | $F_{DP}$     | $F_{OAE}$    | $F_{EO}$     | $F_{MEO}$    | $F_{DP}$      | $F_{OAE}$    | $F_{EO}$     | $F_{MEO}$    | $F_{DP}$     | $F_{OAE}$    | $F_{EO}$     | AUC           |
| EfficientB4 | 5.385        | 1.725        | 1.487        | 5.863        | 8.300        | <b>6.184</b> | 4.377        | 11.062       | 6.796        | 11.849        | 2.856        | 10.300       | 17.586       | <b>8.607</b> | 8.461        | 25.114       | 98.611        |
| SPSL        | 4.411        | 1.827        | 1.037        | 4.534        | 8.055        | 9.379        | 1.135        | 9.789        | 27.614       | 11.232        | 7.270        | 40.943       | 10.379       | 13.259       | 2.464        | 21.679       | 98.747        |
| UnivFD      | 4.503        | 1.19         | 1.622        | 5.408        | 2.577        | 8.556        | 2.748        | 5.536        | 5.436        | 15.249        | 3.793        | 14.148       | 6.119        | 14.026       | 6.287        | 20.255       | 98.192        |
| PG-FDD      | 3.190        | 1.252        | 1.071        | 3.702        | 6.465        | 9.746        | 0.882        | 9.115        | 14.804       | <b>10.467</b> | 5.009        | 29.585       | 9.578        | 14.697       | 3.062        | 18.348       | 99.172        |
| CLIP+MLP    | <b>0.419</b> | <b>0.938</b> | <b>0.227</b> | <b>0.591</b> | <b>0.506</b> | 8.658        | <b>0.334</b> | <b>1.021</b> | <b>0.765</b> | 14.473        | <b>0.395</b> | <b>1.802</b> | <b>1.973</b> | 13.992       | <b>1.000</b> | <b>4.302</b> | <b>99.973</b> |
|             |              |              |              |              |              |              |              |              |              |               |              |              |              |              |              |              | <b>99.290</b> |
|             |              |              |              |              |              |              |              |              |              |               |              |              |              |              |              |              | <b>99.991</b> |
|             |              |              |              |              |              |              |              |              |              |               |              |              |              |              |              |              | <b>0.793</b>  |
|             |              |              |              |              |              |              |              |              |              |               |              |              |              |              |              |              | <b>1.171</b>  |

Table D.9. Fairness and utility performance of CLIP+MLP compared to representative detectors on the AI-Face dataset, highlighting the potential of foundation models for bias mitigation.



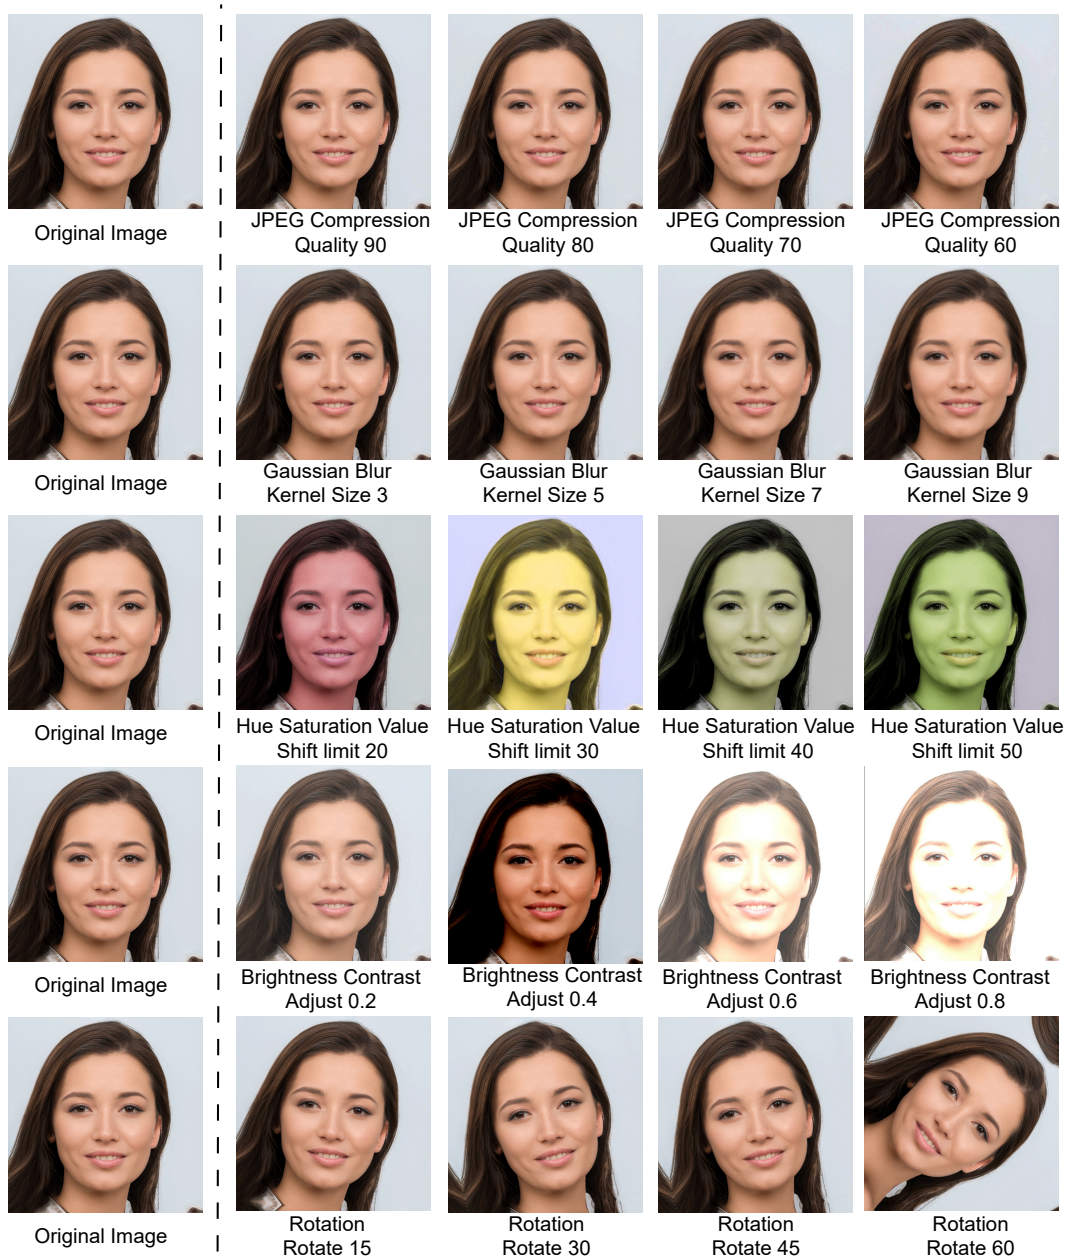

Figure D.2. Visualization of the image after different post-processing.

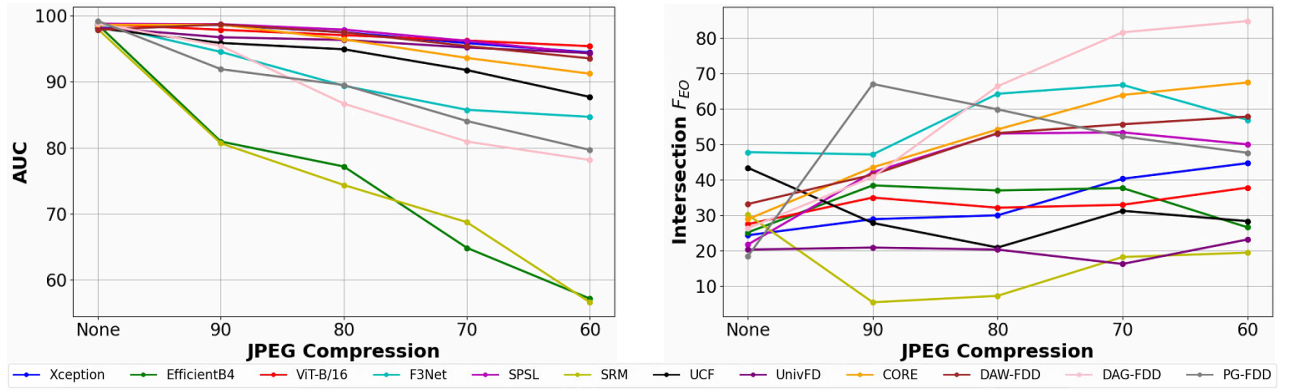

Figure D.3. Robustness analysis in terms of utility and fairness under varying degrees of JPEG compression.

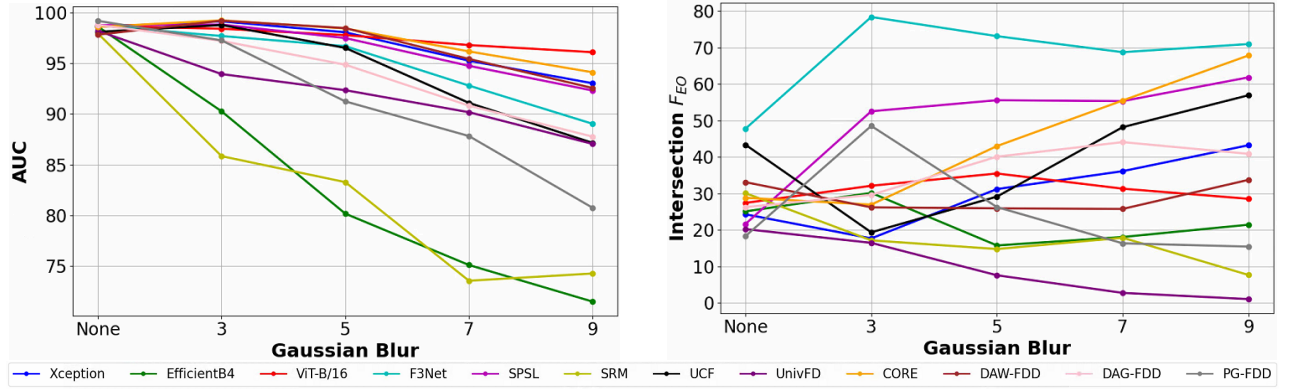

Figure D.4. Robustness analysis in terms of utility and fairness under varying kernel sizes of Gaussian Blur.

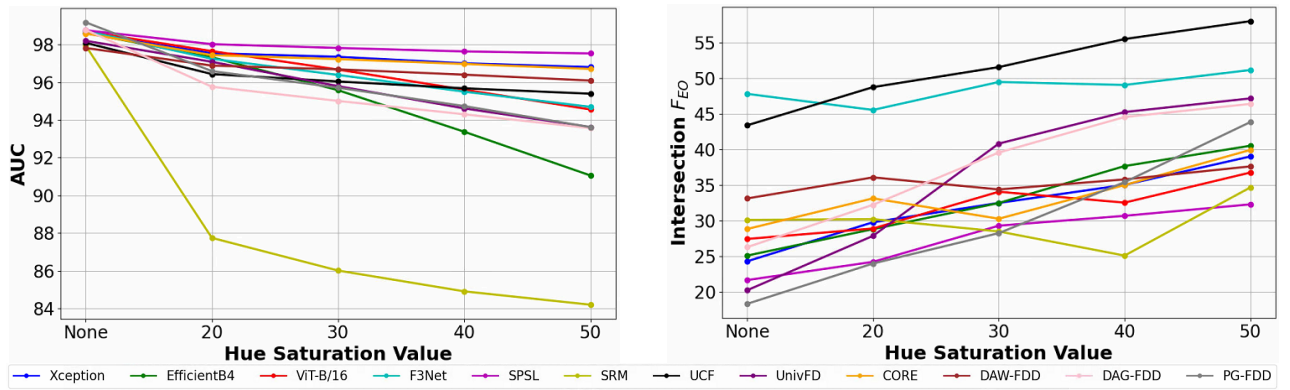

Figure D.5. Robustness analysis in terms of utility and fairness under varying degrees of Hue Saturation Value.

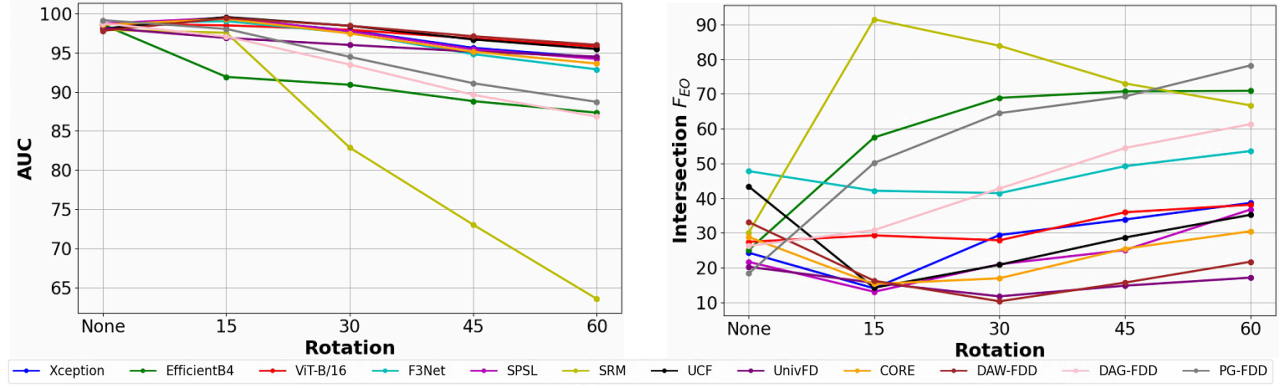

Figure D.6. Robustness analysis in terms of utility and fairness under varying degrees of Rotations.

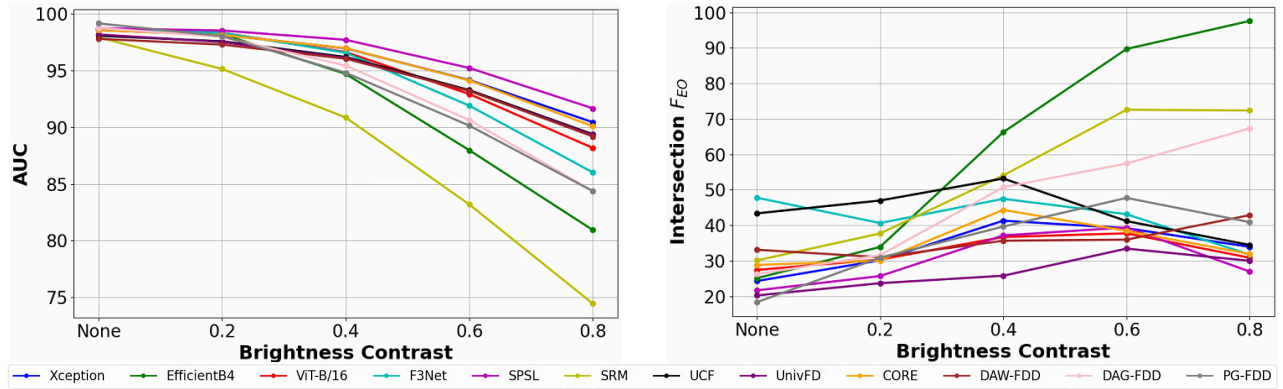

Figure D.7. Robustness analysis in terms of utility and fairness under varying degrees of Brightness Contrast.

## E. Datasheet for AI-Face

In this section, we present a DataSheet [118] for AI-Face.

### E.1. Motivation For Dataset Creation

- **Why is the dataset created?** For researchers to evaluate the fairness of AI face detection models or to train fairer models. Please see Section 2 ‘Background and Motivation’ in the submitted manuscript.
- **Has the dataset been used already?** Yes. Our fairness benchmark is based on this dataset.
- **What (other) tasks could the dataset be used for?** Could be used as training data for generative methods attribution task.

### E.2. Data Composition

- **What are the instances?** The instances that we consider in this work are real face images and AI-generated face images from public datasets.
- **How many instances are there?** We include 1,646,545 face images from public datasets. Please see Table B.1 for details.
- **What data does each instance consist of?** Each instance consists of an image.
- **Is there a label or target associated with each instance?** Each image is associated with gender annotation, age annotation, skin tone annotation, intersectional attribute (gender and skin tone) annotation, and target label (fake or real).
- **Is any information missing from individual instances?** No.
- **Are relationships between individual instances made explicit?** Not applicable – we do not study the relationship between each image.
- **Does the dataset contain all possible instances or is it a sample?** Contains all instances our curation pipeline collected. Since the current dataset does not cover all available images online, there is a high probability more instances can be collected in the future.
- **Are there recommended data splits (e.g., training, development/validation, testing)?** For detector development and training, the dataset can be split as 6:2:2.
- **Are there any errors, sources of noise, or redundancies in the dataset? If so, please provide a description.** Yes. Despite our extensive efforts to mitigate the bias that may introduced by the automated annotator and reduce demographic label noise, there may still be mislabeled instances. Given the dataset’s size of over 1 million images and most are generated face images, it is impractical for humans to manually check and correct each image individually.
- **Is the dataset self-contained, or does it link to or otherwise rely on external resources (e.g., websites, tweets, other datasets)?** The dataset is self-contained.

### E.3. Collection Process

- **What mechanisms or procedures were used to collect the data?** We build our AI-Face dataset by collecting and integrating public AI-generated face images sourced from academic publications, GitHub repositories, and commercial tools. Please see ‘Data Collection’ in Section 3.1
- **How was the data associated with each instance acquired? Was the data directly observable (e.g., raw text, movie ratings), reported by subjects (e.g., survey responses), or indirectly inferred/derived from other data?** The data can be acquired after our verification of user submitted and signed EULA.
- **If the dataset is a sample from a larger set, what was the sampling strategy (e.g., deterministic, probabilistic with specific sampling probabilities)?** Not applicable. We did not sample data from a larger set. But we use RetinaFace [66] for detecting and cropping faces to ensure each image only contains one face.
- **Over what timeframe was the data collected? Does this timeframe match the creation timeframe of the data associated with the instances (e.g., recent crawl of old news articles)? If not, please describe the timeframe in which the data associated with the instances was created.** The data was collected from February 2024 to April 2024, even though the data were originally released before this time. Please refer to the cited papers in Table B.1 for specific original data released time.

### E.4. Data Processing

- **Was any preprocessing/cleaning/labeling of the data done (e.g., discretization or bucketing, tokenization, part-of-speech tagging, SIFT feature extraction, removal of instances, processing of missing values)?** Yes. We discussed in ‘Data Collection’ in Section 3.1.



- **Was the ‘raw’ data saved in addition to the preprocessed/cleaned/labeled data (e.g., to support unanticipated future uses)? If so, please provide a link or other access point to the ‘raw’ data.** The ‘raw’ data can be acquired through the original data publisher. Please see the cited papers in Table B.1.
- **Is the software used to preprocess/clean/label the instances available? If so, please provide a link or other access point.** Yes. We use RetinaFace [66] for detecting and cropping faces to ensure each image only contains one face. Demographic annotations are given by our annotator, see ‘Annotation Generation’ in Section 3.2. Our annotator code will not be released considering the ethical guidelines.
- **Does this dataset collection/processing procedure achieve the motivation for creating the dataset stated in the first section of this datasheet? If not, what are the limitations?** Yes. The dataset does allow for the study of our goal, as it covers comprehensive generation methods, demographic annotations for evaluating current detectors and training fairer detectors.

## E.5. Dataset Distribution

- **How will the dataset be distributed?** We distribute all the data as well as CSV files that formatted all annotations of images under the CC BY-NC-ND 4.0 license and strictly for research purposes.
- **When will the dataset be released/first distributed? What license (if any) is it distributed under?** The dataset will be released following the paper’s acceptance, and it will be under the permissible CC BY-NC-ND 4.0 license for research-based use only. Users can access our dataset by submitting an EULA.
- **Are there any copyrights on the data?** We believe our use is ‘fair use’ since all data in our dataset is collected from public datasets.
- **Are there any fees or access restrictions?** No.

## E.6. Dataset Maintenance

- **Who is supporting/hosting/maintaining the dataset?** The first author of this paper.
- **Will the dataset be updated? If so, how often and by whom?** We do not plan to update it at this time.
- **Is there a repository to link to any/all papers/systems that use this dataset?** Our fairness benchmark uses this dataset, a brief instruction of how to use this dataset and the code of fairness benchmark is on [https://anonymous.4open.science/r/AI\\_Face\\_FairnessBench-E417](https://anonymous.4open.science/r/AI_Face_FairnessBench-E417).
- **If others want to extend/augment/build on this dataset, is there a mechanism for them to do so?** Not at this time.

## E.7. Legal and Ethical Considerations

- **Were any ethical review processes conducted (e.g., by an institutional review board)?** No official processes were done since all data in our dataset were collected from the existing public datasets.
- **Does the dataset contain data that might be considered confidential?** No. We only use data from public datasets.
- **Does the dataset contain data that, if viewed directly, might be offensive, insulting, threatening, or might otherwise cause anxiety? If so, please describe why** No. It is a face image dataset, we have not seen any instance of offensive or abusive content.
- **Does the dataset relate to people?** Yes. It is a face image dataset containing real face images and AI-generated face images.
- **Does the dataset identify any subpopulations (e.g., by age, gender)?** Yes, through demographic annotations.
- **Is it possible to identify individuals (i.e., one or more natural persons), either directly or indirectly (i.e., in combination with other data) from the dataset?** Yes. It is a face image dataset. The age, gender, and skin tone can be identified through the face image, also through the demographic annotation we provide. All of the images that we use are from publicly available data.

## E.8. Author Statement and Confirmation of Data License

The authors of this work declare that the dataset described and provided has been collected, processed, and made available with full adherence to all applicable ethical guidelines and regulations. We accept full responsibility for any violations of rights or ethical guidelines that may arise from the use of this dataset. We also confirm that the dataset is released under the CC BY-NC-ND 4.0 license, permitting sharing and downloading of the work in any medium, provided the original author is credited, and it is used non-commercially with no derivative works created.

## E.9. Annotator Agreement



# Annotator Agreement

**Project Title:** AI-Generated Face Image Annotation

**Date:** 9/15/2024

---

## 1. Introduction

This agreement establishes the guidelines and procedures for annotating AI-generated face images. The primary objective of this task is to ensure the collection of consistent and accurate annotations for gender and age classifications, which will **serve as ground truth for the experiment evaluation of annotation quality**.

## 2. Participants

Three annotators will participate in this project:

- Annotator A: [xxxx]
- Annotator B: [xxxx]
- Annotator C: [xxxx]

## 3. Objective

Annotators are required to:

- Review each provided AI-generated face image.
- Assign appropriate labels for **gender** and **age** according to the guidelines specified in this agreement.
- Ensure consistency and accuracy in annotations across all images.

## 4. Annotation Guidelines

### 4.1. Gender Annotation

Sex at birth (male and female), an individual whose gender identity aligns with those typically associated with the biological sex assigned to them at birth.

- **Female (0):** Images that display characteristics biologically associated with females, including biological features such as a more rounded face, wider hips, and the absence of prominent facial hair. Visually, females often have softer facial features, fuller lips, and

longer hairstyles, though hair length may vary. Females may also show more pronounced cheekbones and smaller noses compared to males.

- **Male (1):** Images that display characteristics biologically associated with males, including biological features such as a more prominent Adam's apple, and facial hair (e.g., beard or mustache). Visually, males often have a more angular jawline, thicker eyebrows, and shorter hairstyles, although hairstyle may vary.

*Note:* If the gender is ambiguous, please select the gender that the facial features most closely resemble based on traditional attributes.

Real images are used as example images to educate human annotators to distinguish demographic attributes..

| Demographic Annotation | Examples                                                                            |                                                                                     |                                                                                      |                                                                                       |
|------------------------|-------------------------------------------------------------------------------------|-------------------------------------------------------------------------------------|--------------------------------------------------------------------------------------|---------------------------------------------------------------------------------------|
| Female: 0              |    |    |    |    |
| Male: 1                |  |  |  |  |

## 4.2. Age Annotation

- **Child (0):** Individuals appearing to be approximately 0-14 years old.
- **Youth (1):** Individuals appearing to be approximately 15-24 years old.
- **Adult (2):** Individuals appearing to be approximately 25-44 years old.
- **Middle-age Adult (3):** Individuals appearing to be approximately 45-64 years old.
- **Senior (4):** Individuals appearing to be 65+ years old.

*Guidelines:*

- Consider facial features such as skin elasticity, wrinkles, and other age-indicating characteristics.
- If uncertain, use your best judgment based on the visual cues present.

| Demographic Annotation      | Examples                                                                            |                                                                                     |                                                                                       |                                                                                       |
|-----------------------------|-------------------------------------------------------------------------------------|-------------------------------------------------------------------------------------|---------------------------------------------------------------------------------------|---------------------------------------------------------------------------------------|
| Child (0-14): 0             |    |    |    |    |
| Youth (15-24): 1            |    |    |    |    |
| Adult (25-44): 2            |    |    |    |    |
| Middle-age Adult (45-64): 3 |   |   |   |   |
| Senior (65+): 4             |  |  |  |  |

#### 4. Annotation Procedure

1. **Review Images:** Each annotator will receive the same set of AI-generated face images.
2. **Independent Work:** Annotations should be done independently to avoid bias.
3. **Data Entry:** For each image, record the assigned labels for gender and age on the CSV files provided.

#### 5. Confidentiality and Data Security

- All images and annotations are confidential.
- Annotators must not share or distribute images or annotation data outside of this project.
- All data should be stored securely, and any physical documents should be kept in a safe location.

## 6. Code of Conduct

- **Impartiality:** Annotators must remain objective and base annotations solely on the guidelines provided.
- **Respect:** Treat all content with respect and professionalism.
- **Compliance:** Adhere strictly to the guidelines to ensure data consistency and integrity.

## 7. Conflict Resolution

- Conflicts will be resolved by majority vote.
- If all three annotators have different annotations (no majority), three annotators will discuss and decide the final annotation.

## 8. Agreement Duration

This agreement is valid for the duration of the annotation project, starting from 9/15/2024 to 9/22/2024.

## 9. Acknowledgment

By signing below, you acknowledge that you have read, understood, and agree to abide by the terms and guidelines outlined in this agreement. All annotators confirm that they are comfortable labeling AI-generated face images and understand that the images do not represent real individuals.

---

### Annotator A

Name: \_\_\_\_\_ Signature: \_\_\_\_\_ Date: \_\_\_\_\_

### Annotator B

Name: \_\_\_\_\_ Signature: \_\_\_\_\_ Date: \_\_\_\_\_

### Annotator C

Name: \_\_\_\_\_ Signature: \_\_\_\_\_ Date: \_\_\_\_\_
